# Supplementary material for: Long-term antibiotics for prevention of recurrent urinary tract infection in older adults: systematic review and meta-analysis of randomised trials
Source: PubMed Central journal article supplement — BMJ Open. 2017 May 29;7(5):e015233. doi: 10.1136/bmjopen-2016-015233 (PMC5729980; doi:10.1136/bmjopen-2016-015233), 2017-05-29
Supplement: bmjopen-2016-015233.draft_revisions.pdf [file bmjopen-2016-015233.draft_revisions.pdf]

# BMJ Open

## Long-term antibiotics for prevention of recurrent urinary tract infection in older adults: systematic review and meta-analysis of randomised trials

|                                 |                                                                                                                                                                                                                                                                                                                                                                                                                                                                                                                                                                 |
|---------------------------------|-----------------------------------------------------------------------------------------------------------------------------------------------------------------------------------------------------------------------------------------------------------------------------------------------------------------------------------------------------------------------------------------------------------------------------------------------------------------------------------------------------------------------------------------------------------------|
| Journal:                        | <i>BMJ Open</i>                                                                                                                                                                                                                                                                                                                                                                                                                                                                                                                                                 |
| Manuscript ID                   | bmjopen-2016-015233                                                                                                                                                                                                                                                                                                                                                                                                                                                                                                                                             |
| Article Type:                   | Research                                                                                                                                                                                                                                                                                                                                                                                                                                                                                                                                                        |
| Date Submitted by the Author:   | 17-Nov-2016                                                                                                                                                                                                                                                                                                                                                                                                                                                                                                                                                     |
| Complete List of Authors:       | Ahmed, Haroon; Cardiff University School of Medicine, Division of Population Medicine<br>Davies, Freya; Cardiff University School of Medicine, Division of Population Medicine<br>Francis, Nick A.; Cardiff University School of Medicine, Division of Population Medicine<br>Farewell, Daniel; Cardiff University School of Medicine, Division of Population Medicine<br>Butler, Christopher; University of Oxford, Department of Primary Care Health Sciences<br>Paranjothy, Shantini; Cardiff University School of Medicine, Division of Population Medicine |
| <b>Primary Subject Heading</b>: | Infectious diseases                                                                                                                                                                                                                                                                                                                                                                                                                                                                                                                                             |
| Secondary Subject Heading:      | Urology, Geriatric medicine, General practice / Family practice                                                                                                                                                                                                                                                                                                                                                                                                                                                                                                 |
| Keywords:                       | Urinary tract infections < UROLOGY, Antibiotic prophylaxis, Antibiotic resistance                                                                                                                                                                                                                                                                                                                                                                                                                                                                               |
|                                 |                                                                                                                                                                                                                                                                                                                                                                                                                                                                                                                                                                 |

SCHOLARONE™  
Manuscripts

**TITLE**

Long-term antibiotics for prevention of recurrent urinary tract infection in older adults:  
systematic review and meta-analysis of randomised trials

**AUTHORS**

Haroon Ahmed (corresponding author),

NIHR Doctoral Research Fellow, Division of Population Medicine, Cardiff University

School of Medicine, [ahmedh2@cardiff.ac.uk](mailto:ahmedh2@cardiff.ac.uk)

Freya Davies,

Clinical Lecturer, Division of Population Medicine, Cardiff University School of

Medicine, [daviesf9@cardiff.ac.uk](mailto:daviesf9@cardiff.ac.uk)

Nick Francis,

Reader, Division of Population Medicine, Cardiff University School of Medicine,

[francisNA@cardiff.ac.uk](mailto:francisNA@cardiff.ac.uk)

Daniel Farewell,

Senior Lecturer, Division of Population Medicine, Cardiff University School of

Medicine, [farewellD@cardiff.ac.uk](mailto:farewellD@cardiff.ac.uk)

1  
2  
3 Chris Butler,  
4

5 Professor of Primary Care, Nuffield Department of Primary Care Health Sciences,  
6

7  
8 University of Oxford, [Christopher.butler@phc.ox.ac.uk](mailto:Christopher.butler@phc.ox.ac.uk)  
9

10  
11  
12  
13  
14 Shantini Paranjothy,  
15

16 Mansel Talbot Professor of Preventive Medicine, Division of Population Medicine,  
17

18 Cardiff University School of Medicine, [paranjothys@cardiff.ac.uk](mailto:paranjothys@cardiff.ac.uk)  
19  
20  
21  
22  
23  
24  
25  
26  
27  
28  
29  
30  
31  
32  
33  
34  
35  
36  
37  
38  
39  
40  
41  
42  
43  
44  
45  
46  
47  
48  
49  
50  
51  
52  
53  
54  
55  
56  
57  
58  
59  
60

## Abstract

### Objective

To address clinical uncertainties about the effectiveness and safety of long-term antibiotic therapy for preventing recurrent UTIs in older adults.

### Design

Systematic review and meta-analysis of randomised trials.

### Method

We searched Medline, Embase, CINAHL and the Cochrane Register of Controlled Trials from inception to August 2016. Eligible studies compared long-term antibiotic therapy with non-antibiotic therapy or placebo in men or women aged over 65, or in postmenopausal women, with recurrent UTIs.

### Results

We did not identify any studies that included older men. Three randomised controlled trials compared long-term antibiotics with vaginal oestrogens (n=150), oral lactobacilli (n=238) and D-mannose powder (n=94) in post-menopausal women. Long-term antibiotics reduced the risk of UTI recurrence by 24% (Three trials, n=482; pooled Risk Ratio (RR) 0.76; 95% confidence interval 0.61 to 0.95, NNT=8.5). There was no statistically significant increase in risk of adverse events (mild adverse events: pooled RR 1.52; 95% confidence interval 0.76 to 3.03; serious adverse events: pooled RR 0.90, 95% confidence interval 0.31 to 2.66). One trial showed 90% of urinary and faecal E coli isolates were resistant to trimethoprim-sulfamethoxazole after one month of prophylaxis.

### Conclusions

3

1  
2  
3 Findings from three small trials with relatively short follow-up periods suggest long-  
4  
5 term antibiotic therapy reduces the risk of recurrence in postmenopausal women with  
6  
7 recurrent UTI. We did not identify any evidence to inform several clinically important  
8  
9 scenarios including, benefits and harms in older men or frail care home residents,  
10  
11 optimal duration of prophylaxis, recurrence rates once prophylaxis stops, and effects  
12  
13 on urinary antibiotic resistance.  
14  
15

#### 16 17 18 19 20 Strengths and limitations of this study

- 21  
22 • Recurrent UTI is one of the most common reasons for long-term antibiotic use in  
23  
24 the frail elderly. We systematically reviewed trial evidence to address clinical  
25  
26 uncertainties around this practice.  
27  
28
- 29  
30 • We did not identify any trials in older men.
- 31  
32 • We identified only three small European trials, with follow-up ranging from 6 to 15  
33  
34 months, in older women.
- 35  
36 • Only one trial measured the impact of long-term antibiotics on antibiotic  
37  
38 resistance.
- 39  
40 • Trial evidence suggests long-term antibiotics reduce the risk of UTI recurrence in  
41  
42 older women. Many clinical uncertainties remain unaddressed.  
43  
44  
45  
46  
47  
48  
49  
50  
51  
52  
53  
54  
55  
56  
57  
58  
59  
60

## Introduction

Older men and women are commonly prescribed long-term antibiotics to prevent recurrent urinary tract infection (UTI).<sup>1, 2</sup> Antibiotic use is a key driver of antibiotic resistance.<sup>3</sup> Therefore, antibiotic use must be justified by robust evidence, where the estimated benefit outweighs estimated harm.

UTIs, and consequently recurrent UTIs, are over-diagnosed in older people.<sup>4, 5</sup> Therefore, antibiotic prophylaxis may actually be prescribed for symptoms that represent bladder dysfunction or localised vaginal symptoms rather than true UTI, and thus will not confer the intended benefit. Multi-morbidity, frailty and polypharmacy are more common in older people and are contributory factors for potential harms such as those related to drug interactions. For example, older adults co-prescribed renin-angiotensin system inhibitors and trimethoprim-containing antibiotics were shown to be at increased risk of hyperkalaemia related hospitalisation<sup>6</sup> and sudden death.<sup>7</sup>

Previous meta-analyses showed antibiotic prophylaxis conferred a relative risk reduction of 79% in the proportion of women experiencing a microbiologically confirmed UTI, compared to placebo.<sup>8</sup> However, these analyses included data from mostly small trials of younger women without co-morbidities. There is uncertainty around the generalizability of these findings to older adults.

There are several important clinical uncertainties relating to long-term antibiotic use in older adults with recurrent UTI, including effect on frequency of infective episodes, optimal duration of prophylaxis, adverse effects, risk of relapse following cessation of prophylaxis and effect on urinary antibiotic resistance. We therefore systematically

1  
2  
3 reviewed randomised controlled trials comparing long-term antibiotic prophylaxis with  
4 placebo or non-antibiotic therapy for preventing further episodes of UTI in older  
5 people. Our main objective was to quantify the benefits and harms of long-term  
6 antibiotics for older adults, to better inform patients and clinicians during clinical  
7 decision-making.  
8  
9  
10  
11  
12

## 13 **Methods**

14  
15  
16  
17 We conducted a systematic review following guidance from the Cochrane handbook  
18 for systematic reviews of interventions for conduct and PRISMA guidelines for  
19 reporting.<sup>9</sup> The review protocol was prospectively registered on PROSPERO;  
20 ([http://www.crd.york.ac.uk/PROSPERO/display\\_record.asp?ID=CRD42015016628](http://www.crd.york.ac.uk/PROSPERO/display_record.asp?ID=CRD42015016628))  
21  
22  
23  
24  
25  
26  
27  
28  
29  
30  
31  
32  
33  
34  
35  
36  
37  
38  
39  
40  
41  
42  
43  
44  
45  
46  
47  
48  
49  
50  
51  
52  
53  
54  
55  
56  
57  
58  
59  
60

### Data sources

We systematically searched Medline, Embase, CINAHL and the Cochrane Central Register of Controlled Trials from inception to March 2016 for English language randomised controlled trials. Our search strategy consisted of keywords and MESH terms for urinary tract infection and randomised trials (appendix 1).

One author (HA) conducted the first screening of potentially relevant records based on titles and abstracts and two authors (HA and FD) independently performed the final selection of included trials based on full text evaluation. Reference lists of included studies and relevant systematic reviews were screened for further potentially relevant studies. Disagreements between the two reviewers were resolved through discussion.

### Study selection

1  
2  
3 We included only randomised controlled trials published in full (i.e., not abstracts) in  
4 English, comparing the effect of long-term antibiotics versus placebo or non-  
5 antibiotic interventions on the rate of UTI in older adults with recurrent UTI. We  
6 defined “long-term antibiotics” as daily antibiotic dosing for at least six months,  
7 “older adults” as women who were postmenopausal or over the age of 65, and men  
8 aged over 65 and “recurrent UTI” as self-reported or clinically recorded history of two  
9 or more UTIs in six months, or three or more in 12 months.  
10  
11  
12  
13  
14  
15  
16  
17  
18

19 We included studies recruiting adults of all ages and screened relevant results to  
20 assess whether reported data allowed estimates of effect size in our specified  
21 population of older adults. For data not presented in this format, we contacted  
22 authors if the study was published in the last ten years and if the mean or median  
23 age in any arm was greater than 50 years.  
24  
25  
26  
27  
28  
29  
30

31 We excluded studies evaluating the effect of prophylactic antibiotics in specific  
32 situations, e.g., post catheterisation, post-surgery, in patients with spinal injuries or in  
33 those with structural renal tract abnormalities.  
34  
35  
36  
37

### 38 Outcome measures

39  
40  
41 Our primary outcome was the number of urinary tract infection recurrences per  
42 patient year during the prophylaxis period, defined microbiologically (>100,000  
43 colony forming units of bacteria/ml of urine) and/or clinically (for example, dysuria,  
44 polyuria, loin pain, fever), or other measure of change in the frequency of UTI events  
45 during prophylaxis. We also aimed to assess the proportion of patients with severe  
46 (requiring withdrawal of treatment) and mild (not requiring withdrawal of treatment)  
47 adverse effects. Secondary outcomes included the proportion of patients who  
48 experienced at least one recurrence after the prophylaxis period, time to first  
49  
50  
51  
52  
53  
54  
55  
56  
57  
58  
59  
60



1  
2  
3 recurrence, proportion of patients with antibiotic resistant micro-organisms in future  
4  
5 urine samples, and quality of life.  
6  
7  
8  
9

#### 10 11 12 Data extraction and quality assessment

13  
14 One reviewer (HA) extracted study characteristics (setting, participants, intervention,  
15 control, funding source) and outcome data from included trials. We contacted two  
16 authors for sub-group data on postmenopausal women. One author replied and  
17 provided relevant outcome data. Two reviewers (HA and SP) independently  
18 assessed the risk of bias of the included studies using the Cochrane Collaboration's  
19 risk of bias tool.<sup>10</sup> Disagreements were resolved through discussion. We used  
20 RevMan version 5.3 to meta-analyse the data and generate forest plots.  
21  
22  
23  
24  
25  
26  
27  
28  
29  
30

#### 31 Data synthesis and analysis

32  
33 Outcomes measured in only one trial were reported narratively. Outcomes measured  
34 in more than one trial were synthesised quantitatively. We estimated between trial  
35 heterogeneity using the  $I^2$  statistic<sup>11</sup> and used random effects meta-analyses to  
36 estimate pooled risk ratios and 95% confidence intervals.<sup>12</sup> We undertook sensitivity  
37 analyses to examine treatment effects according to study quality and assessed the  
38 impact of including data from a potentially eligible trial where the study author did not  
39 reply to our request for data on older participants.  
40  
41  
42  
43  
44  
45  
46  
47  
48  
49

## 50 Results

51  
52 From 6645 records, we identified 53 studies for full-text review (See Appendix 1).  
53 Four studies were eligible for inclusion.<sup>13-16</sup> Two studies recruited only  
54 postmenopausal women.<sup>15, 16</sup> Two studies recruited women of all ages but the  
55  
56  
57  
58  
59  
60

median age was >50 years.<sup>13, 14</sup> For these studies, we contacted authors requesting data for postmenopausal women, or if menopausal status not ascertained, for women aged over 65. We received data from one author and hence included three trials consisting of 534 postmenopausal women in our review (Table 1).<sup>14-16</sup> We did not identify any studies that included older men.

| Study ID        | Setting                                                 | Population                                                                                                    | Intervention                                                                                            | Control                                                                                                                                                                             | Confirmation of UTI                                                               | Outcomes                                                                                                                                                                                                                                                                                                                                                                                                                                    |
|-----------------|---------------------------------------------------------|---------------------------------------------------------------------------------------------------------------|---------------------------------------------------------------------------------------------------------|-------------------------------------------------------------------------------------------------------------------------------------------------------------------------------------|-----------------------------------------------------------------------------------|---------------------------------------------------------------------------------------------------------------------------------------------------------------------------------------------------------------------------------------------------------------------------------------------------------------------------------------------------------------------------------------------------------------------------------------------|
| Raz 2003        | Outpatient infection disease clinics in Northern Israel | Community dwelling postmenopausal women with recurrent UTI <sup>†</sup>                                       | Nitrofurantoin 100mg capsule at night for 9 months, with placebo vaginal pessary to mimic control group | Vaginal pessary containing 0.5mg Estriol daily for two weeks, then once a fortnight for nine months, with oral placebo capsules at night to mimic the intervention group            | >10 <sup>3</sup> colony forming units/mL bacteria in midstream urine              | 1.Number of women experiencing a recurrence during the prophylaxis period<br>2.Mean number of UTIs per woman during the prophylaxis period<br>3.Effects of oestrogens and antibiotics on vaginal mucosa, flora and pH<br>4.Mild and serious adverse events                                                                                                                                                                                  |
| Beerepoort 2012 | Community setting in Amsterdam                          | Community dwelling postmenopausal women with a self-reported history of at least 3 UTIs in the preceding year | Trimethoprim-sulfamethoxazole 480mg tablet at night for 12 months, with placebo capsule twice daily     | One capsule containing at least 10 <sup>9</sup> colony forming units of <i>L rhamnosus GR-1</i> and <i>L reuteri RC-14</i> twice daily for 12 months, with placebo capsule at night | Symptoms +/- >10 <sup>3</sup> colony forming units/mL bacteria in midstream urine | 1.Number of women experiencing a recurrence during, and three months after the prophylaxis period<br>2.Mean number of UTIs per woman during the prophylaxis period<br>3.Median time to first recurrence during and after the prophylaxis period<br>4.Effects of lactobacilli and antibiotics on vaginal flora<br>5.Effects of lactobacilli and antibiotics on urinary and faecal antibiotic resistance<br>6.Mild and serious adverse events |
| Kranjcec 2014   | Outpatients and primary care in Zabok, Croatia          | Community dwelling women with self-reported recurrent UTI <sup>†</sup>                                        | Nitrofurantoin 50mg at night for six months                                                             | Two grams D-mannose powder diluted in 200mls water at night for six months<br>OR<br>No treatment                                                                                    | Symptoms and >10 <sup>3</sup> colony forming units/mL bacteria in midstream urine | 1.Number of women experiencing a recurrence during the prophylaxis period<br>2.Median time to first recurrence during the prophylaxis period<br>3.Adverse events                                                                                                                                                                                                                                                                            |

## Table 1. Characteristics of included studies

† defined as two confirmed episodes of uncomplicated UTI in six months, or three in twelve months.

### Trial characteristics

Trials were conducted in community and outpatient settings in Israel, Netherlands and Croatia. Intervention arms consisted of 6 to 12 months of antibiotic therapy. Control arms consisted of non-antibiotic prophylaxis with vaginal oestrogen pessaries<sup>15</sup>, oral lactobacilli capsules<sup>16</sup>, and D-mannose powder.<sup>14</sup> One trial reported the number of urinary tract infection recurrences per patient year during the prophylaxis period.<sup>16</sup> All trials reported the number of women experiencing a UTI during the prophylaxis period and frequency of adverse events. Only one trial assessed recurrence of UTI after the prophylaxis period (3 months).<sup>16</sup> One trial assessed effect on urinary and faecal bacterial resistance.<sup>16</sup>

### Risk of bias

Figure 1 summarises the risk of bias assessment. Allocation and randomisation details were poorly reported in two trials.<sup>14,15</sup> One trial was assessed as high risk for performance and detection bias; trial arms consisted of an oral antibiotic capsule or D-mannose powder diluted in 200mls water or no treatment with no use of placebo and did not report on blinding of outcome assessors.<sup>14</sup> Only one trial reported a sample size calculation.<sup>14</sup> Overall, one trial was judged to be low risk of bias<sup>16</sup> and two trials unclear risk due to limited reporting of methods.<sup>14,15</sup>

Figure 1. Summary of risk of bias assessment

|                | Random sequence generation (selection bias) | Allocation concealment (selection bias) | Blinding of participants and personnel (performance bias) | Blinding of outcome assessment (detection bias) | Incomplete outcome data (attrition bias) | Selective reporting (reporting bias) | Other bias |
|----------------|---------------------------------------------|-----------------------------------------|-----------------------------------------------------------|-------------------------------------------------|------------------------------------------|--------------------------------------|------------|
| Beerepoot 2012 | +                                           | +                                       | +                                                         | +                                               | +                                        | ?                                    | ?          |
| Kranjcec 2014  | ?                                           | ?                                       | +                                                         | ?                                               | ?                                        | ?                                    | ?          |
| Raz 2003       | ?                                           | ?                                       | +                                                         | +                                               | ?                                        | ?                                    | ?          |

### Effect of long-term antibiotics on recurrent UTI

Compared to a capsule of Lactobacilli, prophylaxis with 480mg of trimethoprim-sulfamethoxazole for 12 months led to fewer microbiologically confirmed UTI episodes per patient year ( mean number of episodes per year = 1.2 versus 1.8, mean difference 0.6 , 95% confidence interval 0.0 to 1.4,  $p=0.02$ ). Prophylaxis with trimethoprim-sulfamethoxazole also led to less women experiencing a microbiologically confirmed UTI during prophylaxis (49.4% versus 62.9%; RR 0.79, 95% confidence interval 0.63 to 1.0), and an increase in time to first UTI (six months versus three months; log-rank  $p=0.02$ ). There was no difference between arms in the mean number of microbiologically confirmed UTI episodes three months after

cessation of prophylaxis (mean number of episodes = 0.1 versus 0.2, mean difference 0.0, 95% confidence interval -0.1 to 0.3,  $p=0.64$ ).<sup>16</sup>

Compared to vaginal oestrogen pessaries, prophylaxis with 100mg of nitrofurantoin for nine months led to fewer women experiencing a UTI during prophylaxis (42.3% versus 64.6%; RR 0.65, 95% confidence interval 0.8 to 0.90), and a lower mean number of UTI's per woman (0.6 episodes per woman versus 1.6 episodes per woman).<sup>15</sup>

Compared to D-mannose powder prophylaxis with 50mg of nitrofurantoin for six months led to more postmenopausal women experiencing a UTI during prophylaxis (24% versus 19%, RR 1.24, 95% confidence interval 0.57 to 2.69).<sup>14</sup>

Random effects meta-analysis (figure 2) shows long-term antibiotic therapy reduces the risk of a woman experiencing a UTI during the prophylaxis period (pooled Risk Ratio 0.76; 95% confidence interval 0.61 to 0.95) with about eight post-menopausal women needing treatment with long-term antibiotics to prevent one woman experiencing a UTI during the prophylaxis period (NNT=8.5).

**Figure 2. Forest plot showing results of meta-analysis for proportion of women experiencing a UTI during the prophylaxis period.**

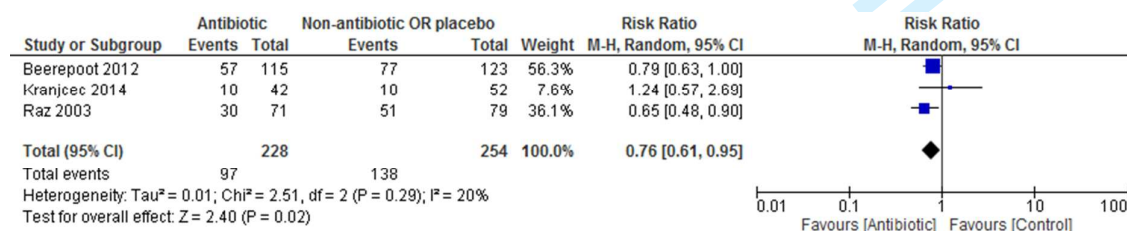

## Adverse events

Commonly reported side effects across the three trials included skin rash, gastrointestinal disturbance and vaginal symptoms. There were no statistically significant difference between odds of adverse events between trimethoprim-sulfamethoxazole and lactobacilli<sup>16</sup>, or between nitrofurantoin and vaginal oestrogens.<sup>15</sup> Risk of side effects with D-mannose powder was significantly lower than with nitrofurantoin (RR 0.28; 95% confidence interval 0.13 to 0.57).<sup>14</sup> Overall, absolute numbers of serious adverse events or events resulting in treatment withdrawal were small.

We had data on mild adverse events (not resulting in treatment withdrawal) for all three trials. There was marked heterogeneity between trials for adverse events ( $I^2 = 86\%$ ).

Meta-analyses showed no statistically significant difference between antibiotics and control for overall risk of mild adverse events (pooled RR 1.52; 95% confidence interval 0.76 to 3.03) (figure 3).

**Figure 3. Forest plot showing results of meta-analysis for proportion of women experiencing mild side effect (treatment not withdrawn) during the prophylaxis period.**

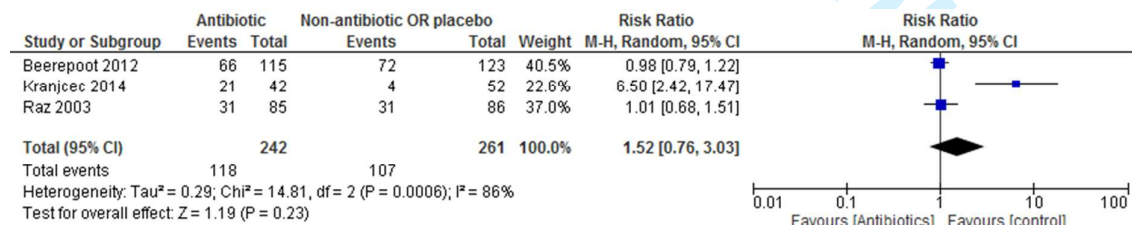

We extracted data for serious adverse events (resulting in treatment withdrawal) for two trials. Meta-analyses showed no statistically significant difference between

antibiotics and control for overall risk of serious adverse events (pooled RR 0.90; 95% confidence interval 0.31 to 2.66; figure 4).

**Figure 4. Forest plot showing results of meta-analysis for proportion of women experiencing a serious side effect (resulting in treatment withdrawal) during the prophylaxis period.**

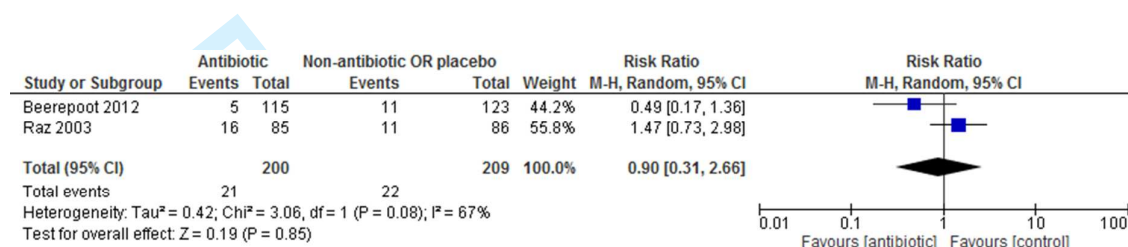

### Effect of long-term antibiotic therapy on bacterial resistance

Compared with lactobacilli, women receiving 12 months prophylaxis with trimethoprim-sulfamethoxazole showed dramatic increases in the proportion of antibiotic resistant bacteria isolated from urine and faeces. For example, 20-40% of urinary and faecal E coli isolates were resistant to trimethoprim-sulfamethoxazole, trimethoprim and amoxicillin at baseline, increasing to 80-95% after one month of treatment. Over the 15 month follow-up period, resistance levels decreased following cessation of prophylaxis but remained above baseline levels.<sup>16</sup>

### Sensitivity analyses

We assessed the impact of removing the study at high risk of bias on effect size and direction.<sup>14</sup> Removal made little difference to the meta-analysis for proportion of women experiencing a UTI during the prophylaxis period (pooled RR 0.74; 95% confidence interval 0.61 to 0.89). Removal did impact on the meta-analysis for proportion of women experiencing mild side effects during the prophylaxis period but

1  
2  
3 overall difference between antibiotics and placebo did not reach statistical  
4  
5 significance (pooled RR 0.99, 95% confidence interval 0.82 to 1.20).  
6  
7

8 We also pooled aggregate data from another potentially relevant study where  
9  
10 authors did not respond to our request for data regarding postmenopausal  
11  
12 women/women over 65.<sup>13</sup> This study compared 500mg of cranberry extract to 100mg  
13  
14 trimethoprim taken at night for six months. However, adding aggregate data for the  
15  
16 whole study population (women aged 45 and above) to our meta-analysis for the  
17  
18 proportion of women experiencing a UTI during the prophylaxis period made little  
19  
20 difference to risk estimates (pooled RR 0.74; 95% confidence interval 0.61 to 0.90).  
21  
22  
23  
24  
25  
26

## 27 Discussion

### 28 Summary

29  
30  
31  
32 This systematic review assessed evidence from three European randomised trials  
33  
34 reported between 2003 and 2014. Trials only included women. Compared to  
35  
36 controls, long-term prophylaxis with antibiotics reduced the risk of postmenopausal  
37  
38 women experiencing a recurrent UTI during the prophylaxis period, without a  
39  
40 statistically significant increase in risk of adverse events. Data from one trial<sup>16</sup>  
41  
42 suggested this benefit was limited to duration of prophylaxis and was not apparent  
43  
44 three months after cessation of prophylactic treatment. Data from one trial<sup>16</sup> showed  
45  
46 long-term antibiotic prophylaxis dramatically increased urinary and faecal antibiotic  
47  
48 resistance. However, trials were small with relatively short follow-up and had  
49  
50 limitations in design and reporting, with one trial judged high risk for bias.  
51  
52  
53  
54

### 55 Strengths and limitations



1  
2  
3 We conducted this review following prospective registration of a review protocol and  
4 in line with guidance from the Cochrane handbook for systematic reviews of  
5 interventions. Our search strategies was comprehensive and supplemented with  
6 reviews of reference lists of relevant trials<sup>13-16</sup>, systematic reviews<sup>8, 17, 18</sup> and clinical  
7 guidelines.<sup>19-21</sup> We contacted authors where additional data were required for study  
8 inclusion. Due to resource constraints, we limited searches to English language and  
9 may have missed potentially relevant studies.  
10  
11  
12  
13  
14  
15  
16  
17  
18

### 19 Comparison with existing literature

20  
21  
22 Meta-analysis of 10 randomised trials of women aged 18 and older found long-term  
23 antibiotics reduced the risk of UTI recurrence during the prophylaxis period by almost  
24 80% (RR 0.21; 95% confidence interval 0.13 to 0.34; NNT = 1.85).<sup>8</sup> Our analyses  
25 showed a smaller effect size and greater NNT for postmenopausal women, possibly  
26 due to more complex pathophysiology of recurrent UTI in this population. We did not  
27 identify a statistically significant increase in risk of adverse events associated with  
28 use of antibiotics. Adverse events are often poorly reported in trials,<sup>22</sup> and we found  
29 heterogeneity for adverse events between trials. In addition, the studies included in  
30 this review compared long-term antibiotic therapy with various non-antibiotic  
31 treatments and not placebo, and this may have influenced effect sizes for adverse  
32 events towards the null. We found small absolute numbers of serious adverse  
33 events, and cannot exclude the possibility of important effects being missed in these  
34 relatively small studies.  
35  
36  
37  
38  
39  
40  
41  
42  
43  
44  
45  
46  
47  
48  
49

50  
51 During two point prevalence surveys, almost half of all adults residing in a sample of  
52 care homes were prescribed antibiotics for prevention of recurrent UTI.<sup>1, 2</sup> Based on  
53 three small trials, with relatively short follow-up periods and design limitations, our  
54  
55  
56  
57  
58  
59  
60

1  
2  
3 meta-analyses suggest that this widely practiced use of prophylaxis reduces risk of  
4  
5 recurrence in women. However, it is still unclear if these benefits extend to older men  
6  
7 or frailer care home populations. These are important gaps in current evidence,  
8  
9 especially given large-scale observational data showing 10% of older men who  
10  
11 experience an acute UTI go on to have at least one recurrence.<sup>23</sup>  
12  
13

14  
15 Only one study followed up participants after cessation of prophylaxis and found that  
16  
17 beneficial effects had ceased after 3 months.<sup>16</sup> Previous studies of younger women  
18  
19 have reported similar findings suggesting that prophylaxis only confers protection  
20  
21 from recurrence during the active prophylaxis phase.<sup>8</sup>  
22  
23

24  
25 We found little data on the impact of long-term antibiotic therapy on antibiotic  
26  
27 resistance. Antibiotic use is associated with increased risk of resistance.<sup>3</sup> Given the  
28  
29 potential harms from acquiring an antibiotic resistant infection, the risk inferred by  
30  
31 long-term antibiotic use is an important factor to consider with patients when making  
32  
33 decisions about antibiotic prophylaxis.  
34  
35

#### 36 Implications for research and practice

37  
38  
39 Based on the data we analysed, a pragmatic approach is required when considering  
40  
41 prescribing long-term antibiotics in older patients with recurrent UTI. Although long-  
42  
43 term antibiotics may reduce the risk of UTI recurrence in women, this benefit  
44  
45 diminishes upon cessation of treatment. Little is known about optimal prophylaxis  
46  
47 period, long-term effects on health, risk of antibiotic resistant infections, effects in  
48  
49 older men, or impact on important patient centred outcomes. These unknowns need  
50  
51 to be balanced against benefits and patient preferences.  
52  
53

54  
55 Future research efforts on recurrent UTI should focus on improving the design and  
56  
57 reporting of trials and developing a core set of outcomes to allow better synthesis of  
58  
59

1  
2  
3 trial data. Antibiotic prophylaxis should be compared with non-antibiotic prophylaxis  
4  
5 with some evidence of efficacy (such as vaginal oestrogens) rather than those with  
6  
7 little or poor evidence of efficacy. Researchers should address unanswered  
8  
9 questions regarding long-term effects, duration of use, adverse effects and antibiotic  
10  
11 resistance.  
12

### 13 14 **Conclusion**

15  
16  
17 There is no data to inform prescribing of long-term antibiotics to older men with  
18  
19 recurrent UTI. Prescribing long-term antibiotics to older women with recurrent UTI  
20  
21 needs careful discussion between patient and clinician of reduced risk of relapse,  
22  
23 potential increases in urinary and faecal antibiotic resistance and rapidly diminished  
24  
25 benefit once prophylaxis stops.  
26  
27  
28  
29  
30  
31  
32  
33  
34  
35  
36  
37  
38  
39  
40  
41  
42  
43  
44  
45  
46  
47  
48  
49  
50  
51  
52  
53  
54  
55  
56  
57  
58  
59  
60

## Acknowledgements

We thank Bojana Kranjčec, Dino Papeš, and Silvio Altarac for providing requested data.

## Funding

This report is independent research arising from a National Institute of Health Research (NIHR) Doctoral Research Fellowship awarded to Haroon Ahmed, and supported by Health and Care Research Wales (HCRW). The views expressed in this publication are those of the authors and not necessarily those of the NIHR, NHS Wales, HCRW or the Welsh Government. The funders had no role in the design or preparation of this manuscript.

## Competing interests

All authors have completed the ICMJE uniform disclosure form at [www.icmje.org/coi\\_disclosure.pdf](http://www.icmje.org/coi_disclosure.pdf) and declare: no support from any organisation for the submitted work; no financial relationships with any organisations that might

1  
2  
3 have an interest in the submitted work in the previous three years; no other  
4  
5 relationships or activities that could appear to have influenced the submitted work.  
6  
7  
8  
9

### 10 **Author contributions**

11  
12  
13 HA, CB, NF, DF and SP conceived and designed the study. HA and FD did the  
14  
15 searches. HA, FD and SP assessed studies for inclusion and risk of bias and  
16  
17 extracted relevant data. HA wrote the first draft of the manuscript. All authors  
18  
19 contributed to further drafts and final manuscript.  
20  
21  
22  
23  
24  
25  
26  
27  
28  
29  
30  
31  
32  
33  
34  
35  
36  
37  
38  
39  
40  
41  
42  
43  
44  
45  
46  
47  
48  
49  
50  
51  
52  
53  
54  
55  
56  
57  
58  
59  
60

Potentially relevant records after excluding duplicates (n=6645)  
 Medline (n=2273) Embase (n=4133) CINAHL (n=53) CENTRAL (n=196)

### Appendix 1: PRISMA flowchart

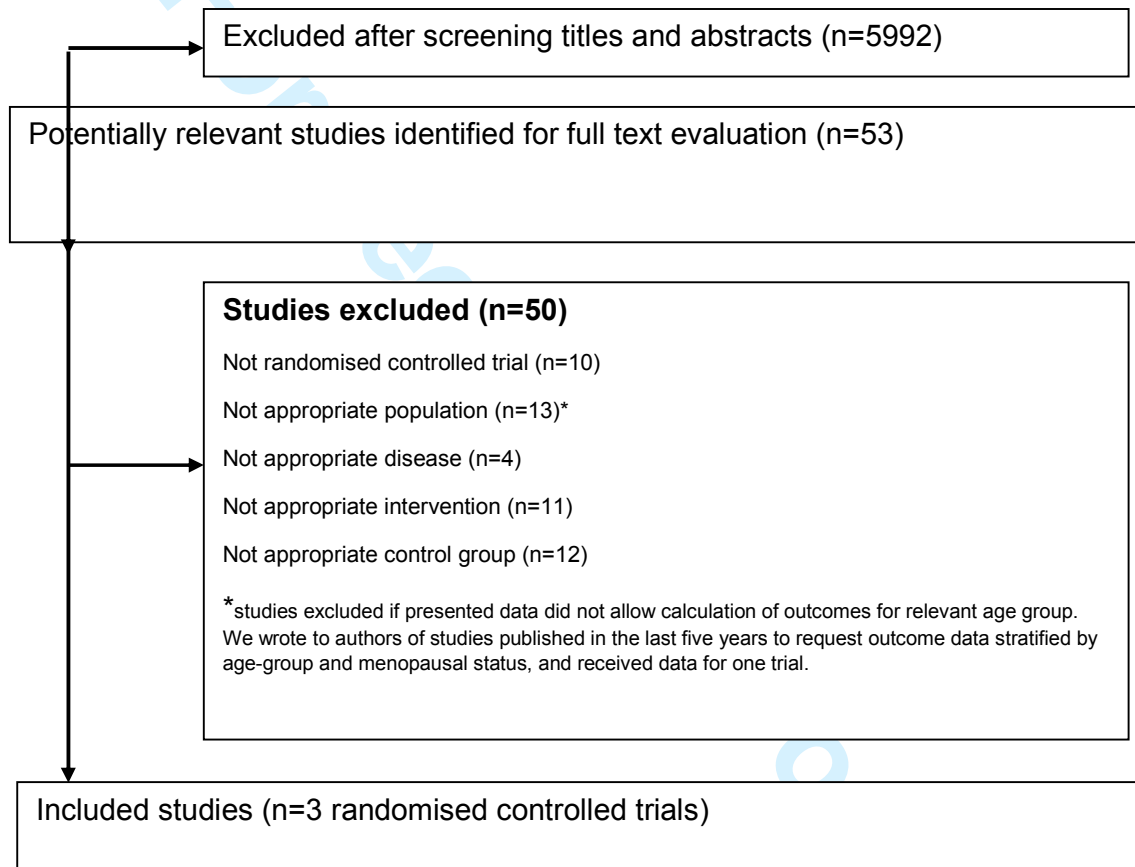

### Appendix 2. Medline Search strategy

1. exp Urinary Tract Infections/
2. Urinary Tract Infection\*.mp.
3. exp Cystitis/

- 1
- 2
- 3 4. (bladder adj infection\*).mp. [mp=title, abstract, original title, name of substance word, subject
- 4 heading word, keyword heading word, protocol supplementary concept word, rare disease
- 5 supplementary concept word, unique identifier]
- 6
- 7
- 8 5. Bacteriuria.mp.
- 9
- 10 6. Pyuria.mp.
- 11
- 12 7. (recurrent adj urinary).mp. [mp=title, abstract, original title, name of substance word, subject
- 13 heading word, keyword heading word, protocol supplementary concept word, rare disease
- 14 supplementary concept word, unique identifier]
- 15
- 16
- 17 8. UTI.mp.
- 18
- 19 9. exp Anti-Bacterial Agents/ or exp Antibiotic Prophylaxis/
- 20
- 21 10. antimicrobial\*.mp.
- 22
- 23 11. randomized controlled trial.pt.
- 24
- 25 12. controlled clinical trial.pt.
- 26
- 27 13. randomized.ab.
- 28
- 29 14. placebo.ab.
- 30
- 31 15. clinical trials as topic.sh.
- 32
- 33 16. randomly.ab.
- 34
- 35 17. trial.ti.
- 36
- 37 18. 1 or 2 or 3 or 4 or 5 or 6 or 7 or 8
- 38
- 39 19. 9 or 10
- 40
- 41 20. 18 and 19
- 42
- 43 21. 11 or 12 or 13 or 14 or 15 or 16 or 17
- 44
- 45 22. exp animals/ not humans.sh.
- 46
- 47 23. 21 not 22
- 48 24. 20 and 23

## References

- 52 1. McClean P, Tunney M, Gilpin D, et al. Antimicrobial prescribing in residential
- 53 homes. *J Antimicrob Chemother* 2012;67(7):1781-90. doi: 10.1093/jac/dks085
- 54 [published Online First: 2012/03/23]
- 55
- 56
- 57
- 58
- 59

- 1  
2  
3 2. McClean P, Tunney M, Gilpin D, et al. Antimicrobial prescribing in nursing homes  
4  
5 in Northern Ireland: results of two point-prevalence surveys. *Drugs Aging*  
6  
7 2011;28(10):819-29. doi: 10.2165/11595050-000000000-00000 [published  
8  
9 Online First: 2011/10/06]  
10
- 11  
12 3. Costelloe C, Metcalfe C, Lovering A, et al. Effect of antibiotic prescribing in  
13  
14 primary care on antimicrobial resistance in individual patients: systematic  
15  
16 review and meta-analysis. *Bmj* 2010;340:c2096. doi: 10.1136/bmj.c2096  
17  
18 [published Online First: 2010/05/21]  
19
- 20  
21 4. Woodford HJ, George J. Diagnosis and management of urinary tract infection in  
22  
23 hospitalized older people. *J Am Geriatr Soc* 2009;57(1):107-14. doi:  
24  
25 10.1111/j.1532-5415.2008.02073.x [published Online First: 2008/12/05]  
26
- 27  
28 5. McMurdo ME, Gillespie ND. Urinary tract infection in old age: over-diagnosed and  
29  
30 over-treated. *Age Ageing* 2000;29(4):297-8. [published Online First:  
31  
32 2000/09/14]  
33
- 34  
35 6. Antoniou T, Gomes T, Juurlink DN, et al. Trimethoprim-sulfamethoxazole-induced  
36  
37 hyperkalemia in patients receiving inhibitors of the renin-angiotensin system:  
38  
39 a population-based study. *Arch Intern Med* 2010;170(12):1045-9. doi:  
40  
41 10.1001/archinternmed.2010.142 [published Online First: 2010/06/30]  
42
- 43  
44 7. Fralick M, Macdonald EM, Gomes T, et al. Co-trimoxazole and sudden death in  
45  
46 patients receiving inhibitors of renin-angiotensin system: population based  
47  
48 study. *Bmj* 2014;349:g6196. doi: 10.1136/bmj.g6196 [published Online First:  
49  
50 2014/11/02]  
51
- 52  
53 8. Albert X, Huertas I, Pereiro, II, et al. Antibiotics for preventing recurrent urinary  
54  
55 tract infection in non-pregnant women. *Cochrane Database Syst Rev*  
56  
57  
58  
59  
60



- 1  
2  
3 2004(3):Cd001209. doi: 10.1002/14651858.CD001209.pub2 [published  
4  
5 Online First: 2004/07/22]  
6  
7  
8 9. Moher D, Liberati A, Tetzlaff J, et al. Preferred reporting items for systematic  
9  
10 reviews and meta-analyses: the PRISMA statement. 2009 doi:  
11  
12 10.1136/bmj.b2535  
13  
14 10. Higgins JPT, Altman DG, Gøtzsche PC, et al. The Cochrane Collaboration's tool  
15  
16 for assessing risk of bias in randomised trials. 2011 doi: 10.1136/bmj.d5928  
17  
18 11. Higgins JPT, Thompson SG, Deeks JJ, et al. Measuring inconsistency in meta-  
19  
20 analyses. 2003 doi: 10.1136/bmj.327.7414.557  
21  
22  
23 12. Borenstein M, Hedges LV, Higgins JP, et al. A basic introduction to fixed-effect  
24  
25 and random-effects models for meta-analysis. *Res Synth Methods*  
26  
27 2010;1(2):97-111. doi: 10.1002/jrsm.12 [published Online First: 2010/04/01]  
28  
29  
30 13. McMurdo ME, Argo I, Phillips G, et al. Cranberry or trimethoprim for the  
31  
32 prevention of recurrent urinary tract infections? A randomized controlled trial  
33  
34 in older women. *J Antimicrob Chemother* 2009;63(2):389-95. doi:  
35  
36 10.1093/jac/dkn489 [published Online First: 2008/12/02]  
37  
38  
39 14. Kranjcec B, Papes D, Altarac S. D-mannose powder for prophylaxis of recurrent  
40  
41 urinary tract infections in women: a randomized clinical trial. *World J Urol*  
42  
43 2014;32(1):79-84. doi: 10.1007/s00345-013-1091-6 [published Online First:  
44  
45 2013/05/02]  
46  
47  
48 15. Raz R, Colodner R, Rohana Y, et al. Effectiveness of estriol-containing vaginal  
49  
50 pessaries and nitrofurantoin macrocrystal therapy in the prevention of  
51  
52 recurrent urinary tract infection in postmenopausal women. *Clinical Infectious*  
53  
54 *Diseases* 2003;36(11):1362-8.  
55  
56  
57  
58  
59  
60

- 1  
2  
3 16. Beerepoot MA, ter Riet G, Nys S, et al. Lactobacilli vs antibiotics to prevent  
4 urinary tract infections: a randomized, double-blind, noninferiority trial in  
5 postmenopausal women. *Arch Intern Med* 2012;172(9):704-12. doi:  
6 10.1001/archinternmed.2012.777 [published Online First: 2012/07/12]  
7  
8  
9  
10  
11 17. Beerepoot MA, Geerlings SE, van Haarst EP, et al. Nonantibiotic prophylaxis for  
12 recurrent urinary tract infections: a systematic review and meta-analysis of  
13 randomized controlled trials. *J Urol* 2013;190(6):1981-9. doi:  
14 10.1016/j.juro.2013.04.142 [published Online First: 2013/07/23]  
15  
16  
17  
18  
19  
20  
21 18. Perrotta C, Aznar M, Mejia R, et al. Oestrogens for preventing recurrent urinary  
22 tract infection in postmenopausal women. *Cochrane Database Syst Rev*  
23 2008(2):Cd005131. doi: 10.1002/14651858.CD005131.pub2 [published  
24 Online First: 2008/04/22]  
25  
26  
27  
28  
29  
30 19. SIGN. Management of suspected bacterial urinary tract infection in adults:  
31 Scottish Intercollegiate Guidelines Network; 2015 [Available from:  
32 <http://www.sign.ac.uk/pdf/sign88.pdf>.  
33  
34  
35  
36  
37 20. Gupta K, Hooton TM, Naber KG, et al. International clinical practice guidelines  
38 for the treatment of acute uncomplicated cystitis and pyelonephritis in women:  
39 A 2010 update by the Infectious Diseases Society of America and the  
40 European Society for Microbiology and Infectious Diseases. *Clin Infect Dis*  
41 2011;52(5):e103-20. doi: 10.1093/cid/ciq257 [published Online First:  
42 2011/02/05]  
43  
44  
45  
46  
47  
48  
49  
50 21. Dason S, Dason JT, Kapoor A. Guidelines for the diagnosis and management of  
51 recurrent urinary tract infection in women. *Can Urol Assoc J* 2011;5(5):316-  
52 22. doi: 10.5489/cuaj.11214  
53  
54  
55  
56  
57  
58  
59  
60

- 1  
2  
3 22. Hodkinson A, Kirkham JJ, Tudur-Smith C, et al. Reporting of harms data in  
4  
5 RCTs: a systematic review of empirical assessments against the CONSORT  
6  
7 harms extension. 2013 doi: 10.1136/bmjopen-2013-003436  
8  
9  
10 23. Drekonja DM, Rector TS, Cutting A, et al. Urinary tract infection in male veterans:  
11  
12 treatment patterns and outcomes. *JAMA Intern Med* 2013;173(1):62-8. doi:  
13  
14 10.1001/2013.jamainternmed.829 [published Online First: 2012/12/06]  
15  
16  
17  
18  
19  
20  
21  
22  
23  
24  
25  
26  
27  
28  
29  
30  
31  
32  
33  
34  
35  
36  
37  
38  
39  
40  
41  
42  
43  
44  
45  
46  
47  
48  
49  
50  
51  
52  
53  
54  
55  
56  
57  
58  
59  
60

## Text S1 - Checklist of items to include when reporting a systematic review or meta-analysis

| Section/topic             | # | Checklist item                                                                                                                                                                                                                                                                                              | Reported on page # |
|---------------------------|---|-------------------------------------------------------------------------------------------------------------------------------------------------------------------------------------------------------------------------------------------------------------------------------------------------------------|--------------------|
| <b>TITLE</b>              |   |                                                                                                                                                                                                                                                                                                             |                    |
| Title                     | 1 | Identify the report as a systematic review, meta-analysis, or both.                                                                                                                                                                                                                                         | 1                  |
| <b>ABSTRACT</b>           |   |                                                                                                                                                                                                                                                                                                             |                    |
| Structured summary        | 2 | Provide a structured summary including, as applicable: background; objectives; data sources; study eligibility criteria, participants, and interventions; study appraisal and synthesis methods; results; limitations; conclusions and implications of key findings; systematic review registration number. | 3 and 4            |
| <b>INTRODUCTION</b>       |   |                                                                                                                                                                                                                                                                                                             |                    |
| Rationale                 | 3 | Describe the rationale for the review in the context of what is already known.                                                                                                                                                                                                                              | 5                  |
| Objectives                | 4 | Provide an explicit statement of questions being addressed with reference to participants, interventions, comparisons, outcomes, and study design (PICOS).                                                                                                                                                  | 6                  |
| <b>METHODS</b>            |   |                                                                                                                                                                                                                                                                                                             |                    |
| Protocol and registration | 5 | Indicate if a review protocol exists, if and where it can be accessed (e.g., Web address), and, if available, provide registration information including registration number.                                                                                                                               | 6                  |
| Eligibility criteria      | 6 | Specify study characteristics (e.g., PICOS, length of follow-up) and report characteristics (e.g., years considered, language, publication status) used as criteria for eligibility, giving rationale.                                                                                                      | 6                  |
| Information sources       | 7 | Describe all information sources (e.g., databases with dates of coverage, contact with study authors to identify additional studies) in the search and date last searched.                                                                                                                                  | 6                  |
| Search                    | 8 | Present full electronic search strategy for at least one database, including any limits used, such that it could be repeated.                                                                                                                                                                               | Appendix2          |

| Section/topic                      | #  | Checklist item                                                                                                                                                                                                         | Reported on page # |
|------------------------------------|----|------------------------------------------------------------------------------------------------------------------------------------------------------------------------------------------------------------------------|--------------------|
| Study selection                    | 9  | State the process for selecting studies (i.e., screening, eligibility, included in systematic review, and, if applicable, included in the meta-analysis).                                                              | 6-7                |
| Data collection process            | 10 | Describe method of data extraction from reports (e.g., piloted forms, independently, in duplicate) and any processes for obtaining and confirming data from investigators.                                             | 8                  |
| Data items                         | 11 | List and define all variables for which data were sought (e.g., PICOS, funding sources) and any assumptions and simplifications made.                                                                                  | 8                  |
| Risk of bias in individual studies | 12 | Describe methods used for assessing risk of bias of individual studies (including specification of whether this was done at the study or outcome level), and how this information is to be used in any data synthesis. | 8                  |
| Summary measures                   | 13 | State the principal summary measures (e.g., risk ratio, difference in means).                                                                                                                                          | 8                  |
| Synthesis of results               | 14 | Describe the methods of handling data and combining results of studies, if done, including measures of consistency (e.g., $I^2$ ) for each meta-analysis.                                                              | 8                  |
| Risk of bias across studies        | 15 | Specify any assessment of risk of bias that may affect the cumulative evidence (e.g., publication bias, selective reporting within studies).                                                                           | -                  |
| Additional analyses                | 16 | Describe methods of additional analyses (e.g., sensitivity or subgroup analyses, meta-regression), if done, indicating which were pre-specified.                                                                       | 8                  |
| <b>RESULTS</b>                     |    |                                                                                                                                                                                                                        |                    |
| Study selection                    | 17 | Give numbers of studies screened, assessed for eligibility, and included in the review, with reasons for exclusions at each stage, ideally with a flow diagram.                                                        | Appendix1          |
| Study characteristics              | 18 | For each study, present characteristics for which data were extracted (e.g., study size, PICOS, follow-up period) and provide the citations.                                                                           | Table1             |
| Risk of bias within studies        | 19 | Present data on risk of bias of each study and, if available, any outcome-level assessment (see Item 12).                                                                                                              | Figure1 page 11    |
| Results of individual studies      | 20 | For all outcomes considered (benefits or harms), present, for each study: (a) simple summary data for each intervention group and (b) effect estimates and                                                             | 12-14              |

| Section/topic               | #  | Checklist item                                                                                                                                                                        | Reported on page # |
|-----------------------------|----|---------------------------------------------------------------------------------------------------------------------------------------------------------------------------------------|--------------------|
|                             |    | confidence intervals, ideally with a forest plot.                                                                                                                                     |                    |
| Synthesis of results        | 21 | Present results of each meta-analysis done, including confidence intervals and measures of consistency.                                                                               | 12-14              |
| Risk of bias across studies | 22 | Present results of any assessment of risk of bias across studies (see Item 15).                                                                                                       | Figure1 page 11    |
| Additional analysis         | 23 | Give results of additional analyses, if done (e.g., sensitivity or subgroup analyses, meta-regression) (see Item 16).                                                                 | 14                 |
| <b>DISCUSSION</b>           |    |                                                                                                                                                                                       |                    |
| Summary of evidence         | 24 | Summarize the main findings including the strength of evidence for each main outcome; consider their relevance to key groups (e.g., health care providers, users, and policy makers). | 15                 |
| Limitations                 | 25 | Discuss limitations at study and outcome level (e.g., risk of bias), and at review level (e.g., incomplete retrieval of identified research, reporting bias).                         | 15                 |
| Conclusions                 | 26 | Provide a general interpretation of the results in the context of other evidence, and implications for future research.                                                               | 16                 |
| <b>FUNDING1</b>             |    |                                                                                                                                                                                       |                    |
| Funding                     | 27 | Describe sources of funding for the systematic review and other support (e.g., supply of data); role of funders for the systematic review.                                            | 19                 |

# BMJ Open

## Long-term antibiotics for prevention of recurrent urinary tract infection in older adults: systematic review and meta-analysis of randomised trials

|                                 |                                                                                                                                                                                                                                                                                                                                                                                                                                                                                                                                                                 |
|---------------------------------|-----------------------------------------------------------------------------------------------------------------------------------------------------------------------------------------------------------------------------------------------------------------------------------------------------------------------------------------------------------------------------------------------------------------------------------------------------------------------------------------------------------------------------------------------------------------|
| Journal:                        | <i>BMJ Open</i>                                                                                                                                                                                                                                                                                                                                                                                                                                                                                                                                                 |
| Manuscript ID                   | bmjopen-2016-015233.R1                                                                                                                                                                                                                                                                                                                                                                                                                                                                                                                                          |
| Article Type:                   | Research                                                                                                                                                                                                                                                                                                                                                                                                                                                                                                                                                        |
| Date Submitted by the Author:   | 28-Jan-2017                                                                                                                                                                                                                                                                                                                                                                                                                                                                                                                                                     |
| Complete List of Authors:       | Ahmed, Haroon; Cardiff University School of Medicine, Division of Population Medicine<br>Davies, Freya; Cardiff University School of Medicine, Division of Population Medicine<br>Francis, Nick A.; Cardiff University School of Medicine, Division of Population Medicine<br>Farewell, Daniel; Cardiff University School of Medicine, Division of Population Medicine<br>Butler, Christopher; University of Oxford, Department of Primary Care Health Sciences<br>Paranjothy, Shantini; Cardiff University School of Medicine, Division of Population Medicine |
| <b>Primary Subject Heading</b>: | Infectious diseases                                                                                                                                                                                                                                                                                                                                                                                                                                                                                                                                             |
| Secondary Subject Heading:      | Urology, Geriatric medicine, General practice / Family practice                                                                                                                                                                                                                                                                                                                                                                                                                                                                                                 |
| Keywords:                       | Urinary tract infections < UROLOGY, Antibiotic prophylaxis, Antibiotic resistance                                                                                                                                                                                                                                                                                                                                                                                                                                                                               |
|                                 |                                                                                                                                                                                                                                                                                                                                                                                                                                                                                                                                                                 |

SCHOLARONE™  
Manuscripts

**TITLE**

Long-term antibiotics for prevention of recurrent urinary tract infection in older adults:  
systematic review and meta-analysis of randomised trials

**AUTHORS**

Haroon Ahmed (corresponding author),

NIHR Doctoral Research Fellow, Division of Population Medicine, Cardiff University

School of Medicine, [ahmedh2@cardiff.ac.uk](mailto:ahmedh2@cardiff.ac.uk)

Freya Davies,

Clinical Lecturer, Division of Population Medicine, Cardiff University School of

Medicine, [daviesf9@cardiff.ac.uk](mailto:daviesf9@cardiff.ac.uk)

Nick Francis,

Reader, Division of Population Medicine, Cardiff University School of Medicine,

[francisNA@cardiff.ac.uk](mailto:francisNA@cardiff.ac.uk)

Daniel Farewell,

Senior Lecturer, Division of Population Medicine, Cardiff University School of

Medicine, [farewellD@cardiff.ac.uk](mailto:farewellD@cardiff.ac.uk)



1  
2  
3 Chris Butler,  
4

5 Professor of Primary Care, Nuffield Department of Primary Care Health Sciences,  
6

7  
8 University of Oxford, [Christopher.butler@phc.ox.ac.uk](mailto:Christopher.butler@phc.ox.ac.uk)  
9

10  
11  
12  
13  
14 Shantini Paranjothy,  
15

16 Mansel Talbot Professor of Preventive Medicine, Division of Population Medicine,  
17

18 Cardiff University School of Medicine, [paranjothys@cardiff.ac.uk](mailto:paranjothys@cardiff.ac.uk)  
19  
20  
21  
22  
23  
24  
25  
26  
27  
28  
29  
30  
31  
32  
33  
34  
35  
36  
37  
38  
39  
40  
41  
42  
43  
44  
45  
46  
47  
48  
49  
50  
51  
52  
53  
54  
55  
56  
57  
58  
59  
60

## Abstract

### Objective

To address clinical uncertainties about the effectiveness and safety of long-term antibiotic therapy for preventing recurrent UTIs in older adults.

### Design

Systematic review and meta-analysis of randomised trials.

### Method

We searched Medline, Embase, CINAHL and the Cochrane Register of Controlled Trials from inception to August 2016. Eligible studies compared long-term antibiotic therapy with non-antibiotic therapy or placebo in men or women aged over 65, or in postmenopausal women, with recurrent UTIs.

### Results

We did not identify any studies that included older men. Three randomised controlled trials compared long-term antibiotics with vaginal oestrogens (n=150), oral lactobacilli (n=238) and D-mannose powder (n=94) in post-menopausal women. Long-term antibiotics reduced the risk of UTI recurrence by 24% (Three trials, n=482; pooled Risk Ratio (RR) 0.76; 95% confidence interval 0.61 to 0.95, NNT=8.5). There was no statistically significant increase in risk of adverse events (mild adverse events: pooled RR 1.52; 95% confidence interval 0.76 to 3.03; serious adverse events: pooled RR 0.90, 95% confidence interval 0.31 to 2.66). One trial showed 90% of urinary and faecal E coli isolates were resistant to trimethoprim-sulfamethoxazole after one month of prophylaxis.

### Conclusions

3

1  
2  
3 Findings from three small trials with relatively short follow-up periods suggest long-  
4  
5 term antibiotic therapy reduces the risk of recurrence in postmenopausal women with  
6  
7 recurrent UTI. We did not identify any evidence to inform several clinically important  
8  
9 scenarios including, benefits and harms in older men or frail care home residents,  
10  
11 optimal duration of prophylaxis, recurrence rates once prophylaxis stops, and effects  
12  
13 on urinary antibiotic resistance.  
14  
15

#### 16 17 18 19 20 Strengths and limitations of this study

- 21  
22 • Recurrent UTI is one of the most common reasons for long-term antibiotic use in  
23  
24 the frail elderly. We systematically reviewed trial evidence to address clinical  
25  
26 uncertainties around this practice.  
27  
28
- 29  
30 • We did not identify any trials in older men, nor any trials in frail care home  
31  
32 residents.  
33
- 34  
35 • We identified only three small European trials, with follow-up ranging from 6 to 15  
36  
37 months, in older women.  
38
- 39  
40 • Only one trial measured the impact of long-term antibiotics on antibiotic  
41  
42 resistance.  
43
- 44  
45 • Trial evidence suggests long-term antibiotics reduce the risk of UTI recurrence in  
46  
47 older women. Many clinical uncertainties remain unaddressed.  
48  
49  
50  
51  
52  
53  
54  
55  
56  
57  
58  
59  
60

## Introduction

Older men and women are commonly prescribed long-term antibiotics to prevent recurrent urinary tract infection (UTI).<sup>1 2</sup> Antibiotic use is a key driver of antibiotic resistance.<sup>3</sup> Therefore, antibiotic use must be justified by robust evidence, where the estimated benefit outweighs estimated harm.

UTIs, and consequently recurrent UTIs, are over-diagnosed in older people.<sup>4 5</sup> Therefore, antibiotic prophylaxis may actually be prescribed for symptoms that represent bladder dysfunction or localised vaginal symptoms rather than true UTI, and thus will not confer the intended benefit. Multi-morbidity, frailty and polypharmacy are more common in older people and are contributory factors for potential harms such as those related to drug interactions. For example, older adults co-prescribed renin-angiotensin system inhibitors and trimethoprim-containing antibiotics were shown to be at increased risk of hyperkalaemia related hospitalisation<sup>6</sup> and sudden death.<sup>7</sup>

Previous meta-analyses showed antibiotic prophylaxis conferred a relative risk reduction of 79% in the proportion of women experiencing a microbiologically confirmed UTI, compared to placebo.<sup>8</sup> However, these analyses included data from mostly small trials of younger women without co-morbidities. There is uncertainty around the generalizability of these findings to older adults.

There are several important clinical uncertainties relating to long-term antibiotic use in older adults with recurrent UTI, including effect on frequency of infective episodes, optimal duration of prophylaxis, adverse effects, risk of relapse following cessation of

1  
2  
3 prophylaxis and effect on urinary antibiotic resistance. We therefore systematically  
4 reviewed randomised controlled trials comparing long-term antibiotic prophylaxis with  
5 placebo or non-antibiotic therapy for preventing further episodes of UTI in older  
6 people. Our main objective was to quantify the benefits and harms of long-term  
7 antibiotics for older adults, to better inform patients and clinicians during clinical  
8 decision-making.  
9  
10  
11  
12  
13  
14  
15

## 16 **Methods**

17  
18  
19 We conducted a systematic review following guidance from the Cochrane handbook  
20 for systematic reviews of interventions for conduct and PRISMA guidelines for  
21 reporting.<sup>9</sup> The review protocol was prospectively registered on PROSPERO;  
22 ([http://www.crd.york.ac.uk/PROSPERO/display\\_record.asp?ID=CRD42015016628](http://www.crd.york.ac.uk/PROSPERO/display_record.asp?ID=CRD42015016628))  
23  
24  
25  
26  
27

28 Registration number: PROSPERO 2015:CRD42015016628).

### 29 Data sources

30  
31  
32 We systematically searched Medline, Embase, CINAHL and the Cochrane Central  
33 Register of Controlled Trials from inception to March 2016 for English language  
34 randomised controlled trials. Our search strategy consisted of keywords and MESH  
35 terms for urinary tract infection and randomised trials (appendix 1).  
36  
37  
38  
39  
40  
41  
42

43  
44 One author (HA) conducted the first screening of potentially relevant records based  
45 on titles and abstracts and two authors (HA and FD) independently performed the  
46 final selection of included trials based on full text evaluation. Reference lists of  
47 included studies and relevant systematic reviews were screened for further  
48 potentially relevant studies. Disagreements between the two reviewers were  
49 resolved through discussion.  
50  
51  
52  
53  
54  
55  
56

### 57 Study selection

58  
59  
60  
6

1  
2  
3 We included only randomised controlled trials published in full (i.e., not abstracts) in  
4 English, comparing the effect of long-term antibiotics versus placebo or non-  
5 antibiotic interventions on the rate of UTI in older adults with recurrent UTI. We  
6 defined “long-term antibiotics” as daily antibiotic dosing for at least six months,  
7 “older adults” as women who were postmenopausal or over the age of 65, and men  
8 aged over 65 and “recurrent UTI” as self-reported or clinically recorded history of two  
9 or more UTIs in six months, or three or more in 12 months.  
10  
11

12  
13  
14 We included studies recruiting adults of all ages and screened relevant results to  
15 assess whether reported data allowed estimates of effect size in our specified  
16 population of older adults. For data not presented in this format, we contacted  
17 authors if the study was published in the last ten years and if the mean or median  
18 age in any arm was greater than 50 years.  
19  
20

21  
22 We excluded studies evaluating the effect of prophylactic antibiotics in specific  
23 situations, e.g., post catheterisation, post-surgery, in patients with spinal injuries or in  
24 those with structural renal tract abnormalities.  
25  
26

### 27 28 29 Outcome measures

30  
31 Our primary outcome was the number of urinary tract infection recurrences per  
32 patient year during the prophylaxis period, defined microbiologically (>100,000  
33 colony forming units of bacteria/ml of urine) and/or clinically (for example, dysuria,  
34 polyuria, loin pain, fever), or other measure of change in the frequency of UTI events  
35 during prophylaxis. We also aimed to assess the proportion of patients with severe  
36 (requiring withdrawal of treatment) and mild (not requiring withdrawal of treatment)  
37 adverse effects. Secondary outcomes included the proportion of patients who  
38 experienced at least one recurrence after the prophylaxis period, time to first  
39  
40  
41  
42  
43  
44  
45  
46  
47  
48  
49  
50  
51  
52  
53  
54  
55  
56  
57  
58  
59  
60

1  
2  
3 recurrence, proportion of patients with antibiotic resistant micro-organisms in future  
4  
5 urine samples, and quality of life.  
6  
7  
8  
9

#### 10 11 12 Data extraction and quality assessment

13  
14 One reviewer (HA) extracted study characteristics (setting, participants, intervention,  
15 control, funding source) and outcome data from included trials. We contacted two  
16 authors for sub-group data on postmenopausal women. One author replied and  
17 provided relevant outcome data. Two reviewers (HA and SP) independently  
18 assessed the risk of bias of the included studies using the Cochrane Collaboration's  
19 risk of bias tool.<sup>10</sup> Disagreements were resolved through discussion. We used  
20 RevMan version 5.3 to meta-analyse the data and generate forest plots.  
21  
22  
23  
24  
25  
26  
27  
28  
29  
30

#### 31 Data synthesis and analysis

32  
33 Outcomes measured in only one trial were reported narratively. Outcomes measured  
34 in more than one trial were synthesised quantitatively. We estimated between trial  
35 heterogeneity using the  $I^2$  statistic<sup>11</sup> and used random effects meta-analyses to  
36 estimate pooled risk ratios and 95% confidence intervals.<sup>12</sup> We undertook sensitivity  
37 analyses to examine treatment effects according to study quality and assessed the  
38 impact of including data from a potentially eligible trial where the study author did not  
39 reply to our request for data on older participants.  
40  
41  
42  
43  
44  
45  
46  
47  
48  
49

### 50 **Results**

51  
52 From 6645 records, we identified 53 studies for full-text review (See Appendix 1).  
53 Four studies were eligible for inclusion.<sup>13-16</sup> Two studies recruited only  
54 postmenopausal women.<sup>15 16</sup> Two studies recruited women of all ages but the  
55  
56  
57  
58  
59  
60

median age was >50 years.<sup>13 14</sup> For these studies, we contacted authors requesting data for postmenopausal women, or if menopausal status not ascertained, for women aged over 65. We received data from one author and hence included three trials consisting of 534 postmenopausal women in our review (Table 1).<sup>14-16</sup> We did not identify any studies that included older men.

| Study ID        | Setting                                                 | Population                                                                                                    | Intervention                                                                                            | Control                                                                                                                                                                             | Confirmation of UTI                                                               | Outcomes                                                                                                                                                                                                                                                                                                                                                                                                                                    |
|-----------------|---------------------------------------------------------|---------------------------------------------------------------------------------------------------------------|---------------------------------------------------------------------------------------------------------|-------------------------------------------------------------------------------------------------------------------------------------------------------------------------------------|-----------------------------------------------------------------------------------|---------------------------------------------------------------------------------------------------------------------------------------------------------------------------------------------------------------------------------------------------------------------------------------------------------------------------------------------------------------------------------------------------------------------------------------------|
| Raz 2003        | Outpatient infection disease clinics in Northern Israel | Community dwelling postmenopausal women with recurrent UTI <sup>†</sup>                                       | Nitrofurantoin 100mg capsule at night for 9 months, with placebo vaginal pessary to mimic control group | Vaginal pessary containing 0.5mg Estriol daily for two weeks, then once a fortnight for nine months, with oral placebo capsules at night to mimic the intervention group            | >10 <sup>3</sup> colony forming units/mL bacteria in midstream urine              | 1.Number of women experiencing a recurrence during the prophylaxis period<br>2.Mean number of UTIs per woman during the prophylaxis period<br>3.Effects of oestrogens and antibiotics on vaginal mucosa, flora and pH<br>4.Mild and serious adverse events                                                                                                                                                                                  |
| Beerepoort 2012 | Community setting in Amsterdam                          | Community dwelling postmenopausal women with a self-reported history of at least 3 UTIs in the preceding year | Trimethoprim-sulfamethoxazole 480mg tablet at night for 12 months, with placebo capsule twice daily     | One capsule containing at least 10 <sup>9</sup> colony forming units of <i>L rhamnosus GR-1</i> and <i>L reuteri RC-14</i> twice daily for 12 months, with placebo capsule at night | Symptoms +/- >10 <sup>3</sup> colony forming units/mL bacteria in midstream urine | 1.Number of women experiencing a recurrence during, and three months after the prophylaxis period<br>2.Mean number of UTIs per woman during the prophylaxis period<br>3.Median time to first recurrence during and after the prophylaxis period<br>4.Effects of lactobacilli and antibiotics on vaginal flora<br>5.Effects of lactobacilli and antibiotics on urinary and faecal antibiotic resistance<br>6.Mild and serious adverse events |
| Kranjcec 2014   | Outpatients and primary care in Zabok, Croatia          | Community dwelling women with self-reported recurrent UTI <sup>†</sup>                                        | Nitrofurantoin 50mg at night for six months                                                             | Two grams D-mannose powder diluted in 200mls water at night for six months<br>OR<br>No treatment                                                                                    | Symptoms and >10 <sup>3</sup> colony forming units/mL bacteria in midstream urine | 1.Number of women experiencing a recurrence during the prophylaxis period<br>2.Median time to first recurrence during the prophylaxis period<br>3.Adverse events                                                                                                                                                                                                                                                                            |



## Table 1. Characteristics of included studies

† defined as two confirmed episodes of uncomplicated UTI in six months, or three in twelve months.

### Trial characteristics

Trials were conducted in community and outpatient settings in Israel, Netherlands and Croatia. Only one trial included individuals with diabetes<sup>16</sup> and only one trial included individuals with renal impairment.<sup>14</sup> Intervention arms consisted of 6 to 12 months of antibiotic therapy. Control arms consisted of non-antibiotic prophylaxis with vaginal oestrogen pessaries<sup>15</sup>, oral lactobacilli capsules<sup>16</sup>, and D-mannose powder.<sup>14</sup> One trial reported the number of urinary tract infection recurrences per patient year during the prophylaxis period.<sup>16</sup> All trials reported the number of women experiencing a UTI during the prophylaxis period and frequency of adverse events. Only one trial assessed recurrence of UTI after the prophylaxis period (3 months).<sup>16</sup> One trial assessed effect on urinary and faecal bacterial resistance.<sup>16</sup>

### Risk of bias

Figure 1 summarises the risk of bias assessment. Allocation and randomisation details were poorly reported in two trials.<sup>14,15</sup> One trial was assessed as high risk for performance and detection bias; trial arms consisted of an oral antibiotic capsule or D-mannose powder diluted in 200mls water or no treatment with no use of placebo and did not report on blinding of outcome assessors.<sup>14</sup> Only one trial reported a sample size calculation.<sup>14</sup> Overall, one trial was judged to be low risk of bias<sup>16</sup> and two trials unclear risk due to limited reporting of methods.<sup>14,15</sup>

### Figure 1. Summary of risk of bias assessment

## Effect of long-term antibiotics on recurrent UTI

Compared to a capsule of Lactobacilli, prophylaxis with 480mg of trimethoprim-sulfamethoxazole for 12 months led to fewer microbiologically confirmed UTI episodes per patient year ( mean number of episodes per year = 1.2 versus 1.8, mean difference 0.6 , 95% confidence interval 0.0 to 1.4,  $p=0.02$ ). Prophylaxis with trimethoprim-sulfamethoxazole also led to less women experiencing a microbiologically confirmed UTI during prophylaxis (49.4% versus 62.9%; RR 0.79, 95% confidence interval 0.63 to 1.0), and an increase in time to first UTI (six months versus three months; log-rank  $p=0.02$ ). There was no difference between arms in the mean number of microbiologically confirmed UTI episodes three months after cessation of prophylaxis (mean number of episodes = 0.1 versus 0.2, mean difference 0.0, 95% confidence interval -0.1 to 0.3,  $p=0.64$ ).<sup>16</sup>

Compared to vaginal oestrogen pessaries, prophylaxis with 100mg of nitrofurantoin for nine months led to fewer women experiencing a UTI during prophylaxis (42.3% versus 64.6%; RR 0.65, 95% confidence interval 0.8 to 0.90), and a lower mean number of UTI's per woman (0.6 episodes per woman versus 1.6 episodes per woman).<sup>15</sup>

Compared to D-mannose powder prophylaxis with 50mg of nitrofurantoin for six months led to more postmenopausal women experiencing a UTI during prophylaxis (24% versus 19%, RR 1.24, 95% confidence interval 0.57 to 2.69).<sup>14</sup>

Random effects meta-analysis (figure 2) shows long-term antibiotic therapy reduces the risk of a woman experiencing a UTI during the prophylaxis period (pooled Risk Ratio 0.76; 95% confidence interval 0.61 to 0.95) with about eight post-menopausal

1  
2  
3 women needing treatment with long-term antibiotics to prevent one woman  
4 experiencing a UTI during the prophylaxis period (NNT=8.5).  
5  
6  
7

8 **Figure 2. Forest plot showing results of meta-analysis for proportion of women**  
9 **experiencing a UTI during the prophylaxis period.**  
10  
11

#### 12 Adverse events

13  
14  
15  
16  
17  
18  
19 Commonly reported side effects across the three trials included skin rash,  
20 gastrointestinal disturbance and vaginal symptoms. There were no statistically  
21 significant difference between odds of adverse events between trimethoprim-  
22 sulfamethoxazole and lactobacilli <sup>16</sup>, or between nitrofurantoin and vaginal  
23 oestrogens. <sup>15</sup> Risk of side effects with D-mannose powder was significantly lower  
24 than with nitrofurantoin (RR 0.28; 95% confidence interval 0.13 to 0.57).<sup>14</sup> Overall,  
25 absolute numbers of serious adverse events or events resulting in treatment  
26 withdrawal were small.  
27  
28  
29  
30  
31  
32  
33  
34  
35

36  
37 We had data on mild adverse events (not resulting in treatment withdrawal) for all  
38 three trials. There was marked heterogeneity between trials for adverse events ( $I^2 =$   
39 86%).  
40  
41  
42

43  
44  
45  
46  
47  
48  
49  
50  
51  
52  
53  
54  
55  
56  
57  
58  
59  
60

Meta-analyses showed no statistically significant difference between antibiotics and control for overall risk of mild adverse events (pooled RR 1.52; 95% confidence interval 0.76 to 3.03) (figure 3).

52 **Figure 3. Forest plot showing results of meta-analysis for proportion of women**  
53 **experiencing mild side effect (treatment not withdrawn) during the prophylaxis**  
54 **period.**  
55  
56  
57  
58  
59  
60

1  
2  
3  
4  
5  
6 We extracted data for serious adverse events (resulting in treatment withdrawal) for  
7  
8 two trials. Meta-analyses showed no statistically significant difference between  
9  
10 antibiotics and control for overall risk of serious adverse events (pooled RR 0.90;  
11  
12 95% confidence interval 0.31 to 2.66; figure 4).  
13

14  
15 **Figure 4. Forest plot showing results of meta-analysis for proportion of women**  
16  
17 **experiencing a serious side effect (resulting in treatment withdrawal) during**  
18  
19 **the prophylaxis period.**  
20  
21

22  
23  
24  
25  
26 Effect of long-term antibiotic therapy on bacterial resistance  
27

28 Compared with lactobacilli, women receiving 12 months prophylaxis with  
29  
30 trimethoprim-sulfamethoxazole showed dramatic increases in the proportion of  
31  
32 antibiotic resistant bacteria isolated from urine and faeces. For example, 20-40% of  
33  
34 urinary and faecal E coli isolates were resistant to trimethoprim-sulfamethoxazole,  
35  
36 trimethoprim and amoxicillin at baseline, increasing to 80-95% after one month of  
37  
38 treatment. Over the 15 month follow-up period, resistance levels decreased following  
39  
40 cessation of prophylaxis but remained above baseline levels.<sup>16</sup>  
41  
42  
43

44  
45 Sensitivity analyses  
46

47 We assessed the impact of removing the study at high risk of bias on effect size and  
48  
49 direction.<sup>14</sup> Removal made little difference to the meta-analysis for proportion of  
50  
51 women experiencing a UTI during the prophylaxis period (pooled RR 0.74; 95%  
52  
53 confidence interval 0.61 to 0.89). Removal did impact on the meta-analysis for  
54  
55 proportion of women experiencing mild side effects during the prophylaxis period but  
56  
57  
58  
59  
60

1  
2  
3 overall difference between antibiotics and placebo did not reach statistical  
4  
5 significance (pooled RR 0.99, 95% confidence interval 0.82 to 1.20).  
6  
7

8 We also pooled aggregate data from another potentially relevant study where  
9  
10 authors did not respond to our request for data regarding postmenopausal  
11  
12 women/women over 65.<sup>13</sup> This study compared 500mg of cranberry extract to 100mg  
13  
14 trimethoprim taken at night for six months. However, adding aggregate data for the  
15  
16 whole study population (women aged 45 and above) to our meta-analysis for the  
17  
18 proportion of women experiencing a UTI during the prophylaxis period made little  
19  
20 difference to risk estimates (pooled RR 0.74; 95% confidence interval 0.61 to 0.90).  
21  
22  
23

## 24 **Discussion**

### 25 26 27 Summary

28  
29  
30 This systematic review assessed evidence from three European randomised trials  
31  
32 reported between 2003 and 2014. Trials only included women. Compared to  
33  
34 controls, long-term prophylaxis with antibiotics reduced the risk of postmenopausal  
35  
36 women experiencing a recurrent UTI during the prophylaxis period, without a  
37  
38 statistically significant increase in risk of adverse events. Data from one trial<sup>16</sup>  
39  
40 suggested this benefit was limited to duration of prophylaxis and was not apparent  
41  
42 three months after cessation of prophylactic treatment. Data from one trial<sup>16</sup> showed  
43  
44 long-term antibiotic prophylaxis dramatically increased urinary and faecal antibiotic  
45  
46 resistance. However, trials were small with relatively short follow-up and had  
47  
48 limitations in design and reporting, with one trial judged high risk for bias.  
49  
50  
51

### 52 53 Strengths and limitations

54  
55  
56 We conducted this review following prospective registration of a review protocol and  
57  
58 in line with guidance from the Cochrane handbook for systematic reviews of  
59  
60

1  
2  
3 interventions. Our search strategies was comprehensive and supplemented with  
4  
5 reviews of reference lists of relevant trials<sup>13-16</sup>, systematic reviews<sup>8 17 18</sup> and clinical  
6  
7 guidelines.<sup>19-21</sup> We contacted authors where additional data were required for study  
8  
9 inclusion. Due to resource constraints, we limited searches to English language and  
10  
11 may have missed potentially relevant studies.  
12

### 13 14 15 Comparison with existing literature

16  
17  
18 Meta-analysis of 10 randomised trials of women aged 18 and older found long-term  
19  
20 antibiotics reduced the risk of UTI recurrence during the prophylaxis period by almost  
21  
22 80% (RR 0.21; 95% confidence interval 0.13 to 0.34; NNT = 1.85).<sup>8</sup> Our analyses  
23  
24 showed a smaller effect size and greater NNT for postmenopausal women, possibly  
25  
26 due to more complex pathophysiology of recurrent UTI in this population. We did not  
27  
28 identify a statistically significant increase in risk of adverse events associated with  
29  
30 use of antibiotics. Adverse events are often poorly reported in trials,<sup>22</sup> and we found  
31  
32 heterogeneity for adverse events between trials. In addition, the studies included in  
33  
34 this review compared long-term antibiotic therapy with various non-antibiotic  
35  
36 treatments and not placebo, and this may have influenced effect sizes for adverse  
37  
38 events towards the null. We found small absolute numbers of serious adverse  
39  
40 events, and cannot exclude the possibility of important effects being missed in these  
41  
42 relatively small studies.  
43  
44  
45

46  
47 During two point prevalence surveys, almost half of all adults residing in a sample of  
48  
49 care homes were prescribed antibiotics for prevention of recurrent UTI.<sup>1 2</sup> Based on  
50  
51 three small trials, with relatively short follow-up periods and design limitations, our  
52  
53 meta-analyses suggest that this widely practiced use of prophylaxis reduces risk of  
54  
55 recurrence in women. However, it is still unclear if these benefits extend to older men  
56  
57  
58  
59  
60

1  
2  
3 or frailer care home populations. These are important gaps in current evidence,  
4  
5 especially given large-scale observational data showing 10% of older men who  
6  
7 experience an acute UTI go on to have at least one recurrence.<sup>23</sup>  
8  
9

10 Only one study followed up participants after cessation of prophylaxis and found that  
11  
12 beneficial effects had ceased after 3 months.<sup>16</sup> Previous studies of younger women  
13  
14 have reported similar findings suggesting that prophylaxis only confers protection  
15  
16 from recurrence during the active prophylaxis phase.<sup>8</sup>  
17  
18

19 We found little data on the impact of long-term antibiotic therapy on antibiotic  
20  
21 resistance. Antibiotic use is associated with increased risk of resistance.<sup>3</sup> Given the  
22  
23 potential harms from acquiring an antibiotic resistant infection, the risk inferred by  
24  
25 long-term antibiotic use is an important factor to consider with patients when making  
26  
27 decisions about antibiotic prophylaxis.  
28  
29

### 30 31 Implications for research and practice 32 33

34 Based on the data we analysed, a pragmatic approach is required when considering  
35  
36 prescribing long-term antibiotics in older patients with recurrent UTI. Although long-  
37  
38 term antibiotics may reduce the risk of UTI recurrence in women, this benefit  
39  
40 diminishes upon cessation of treatment. Little is known about optimal prophylaxis  
41  
42 period, long-term effects on health, risk of antibiotic resistant infections, effect in  
43  
44 older men, effect in frail care home residents, or impact on important patient centred  
45  
46 outcomes. These unknowns must be balanced against benefits and patient  
47  
48 preferences.  
49  
50

51  
52 Future research efforts on recurrent UTI should focus on improving the design and  
53  
54 reporting of trials and developing a core set of outcomes to allow better synthesis of  
55  
56 trial data. Antibiotic prophylaxis should be compared with non-antibiotic prophylaxis  
57  
58  
59

1  
2  
3 with some evidence of efficacy (such as vaginal oestrogens) rather than those with  
4  
5 little or poor evidence of efficacy. Researchers should address unanswered  
6  
7 questions regarding long-term effects, duration of use, adverse effects and antibiotic  
8  
9 resistance.  
10

### 11 12 **Conclusion**

13  
14  
15 There is ongoing uncertainty around the benefits and harms of long-term antibiotics  
16  
17 in older men and frail care home residents with recurrent UTI. Prescribing long-term  
18  
19 antibiotics to older women with recurrent UTI needs careful discussion between  
20  
21 patient and clinician of reduced risk of relapse, potential increases in urinary and  
22  
23 faecal antibiotic resistance and rapidly diminished benefit once prophylaxis stops.  
24  
25  
26  
27  
28  
29  
30  
31  
32  
33  
34  
35  
36  
37  
38  
39  
40  
41  
42  
43  
44  
45  
46  
47  
48  
49  
50  
51  
52  
53  
54  
55  
56  
57  
58  
59  
60



### Acknowledgements

We thank Bojana Kranjčec, Dino Papeš, and Silvio Altarac for providing requested data.

### Funding

This report is independent research arising from a National Institute of Health Research (NIHR) Doctoral Research Fellowship awarded to Haroon Ahmed, and supported by Health and Care Research Wales (HCRW). The views expressed in this publication are those of the authors and not necessarily those of the NIHR, NHS Wales, HCRW or the Welsh Government. The funders had no role in the design or preparation of this manuscript.

### Competing interests

All authors have completed the ICMJE uniform disclosure form at [www.icmje.org/coi\\_disclosure.pdf](http://www.icmje.org/coi_disclosure.pdf) and declare: no support from any organisation

1  
2  
3 for the submitted work; no financial relationships with any organisations that might  
4  
5 have an interest in the submitted work in the previous three years; no other  
6  
7 relationships or activities that could appear to have influenced the submitted work.  
8  
9

### 10 11 12 13 **Author contributions**

14  
15  
16 HA, CB, NF, DF and SP conceived and designed the study. HA and FD did the  
17  
18 searches. HA, FD and SP assessed studies for inclusion and risk of bias and  
19  
20 extracted relevant data. HA wrote the first draft of the manuscript. All authors  
21  
22 contributed to further drafts and final manuscript.  
23  
24  
25  
26  
27  
28  
29  
30  
31  
32  
33  
34  
35  
36  
37  
38  
39  
40  
41  
42  
43  
44  
45  
46  
47  
48  
49  
50  
51  
52  
53  
54  
55  
56  
57  
58  
59  
60

## References

1. McClean P, Tunney M, Gilpin D, et al. Antimicrobial prescribing in residential homes. *J Antimicrob Chemother* 2012;67(7):1781-90. doi: 10.1093/jac/dks085 [published Online First: 2012/03/23]
2. McClean P, Tunney M, Gilpin D, et al. Antimicrobial prescribing in nursing homes in Northern Ireland: results of two point-prevalence surveys. *Drugs Aging* 2011;28(10):819-29. doi: 10.2165/11595050-000000000-00000 [published Online First: 2011/10/06]
3. Costelloe C, Metcalfe C, Lovering A, et al. Effect of antibiotic prescribing in primary care on antimicrobial resistance in individual patients: systematic review and meta-analysis. *Bmj* 2010;340:c2096. doi: 10.1136/bmj.c2096 [published Online First: 2010/05/21]
4. Woodford HJ, George J. Diagnosis and management of urinary tract infection in hospitalized older people. *J Am Geriatr Soc* 2009;57(1):107-14. doi: 10.1111/j.1532-5415.2008.02073.x [published Online First: 2008/12/05]
5. McMurdo ME, Gillespie ND. Urinary tract infection in old age: over-diagnosed and over-treated. *Age Ageing* 2000;29(4):297-8. [published Online First: 2000/09/14]
6. Antoniou T, Gomes T, Juurlink DN, et al. Trimethoprim-sulfamethoxazole-induced hyperkalemia in patients receiving inhibitors of the renin-angiotensin system: a population-based study. *Arch Intern Med* 2010;170(12):1045-9. doi: 10.1001/archinternmed.2010.142 [published Online First: 2010/06/30]
7. Fralick M, Macdonald EM, Gomes T, et al. Co-trimoxazole and sudden death in patients receiving inhibitors of renin-angiotensin system: population based study. *Bmj* 2014;349:g6196. doi: 10.1136/bmj.g6196 [published Online First: 2014/11/02]
8. Albert X, Huertas I, Pereiro, II, et al. Antibiotics for preventing recurrent urinary tract infection in non-pregnant women. *Cochrane Database Syst Rev* 2004(3):Cd001209. doi: 10.1002/14651858.CD001209.pub2 [published Online First: 2004/07/22]
9. Moher D, Liberati A, Tetzlaff J, et al. Preferred reporting items for systematic reviews and meta-analyses: the PRISMA statement. 2009 doi: 10.1136/bmj.b2535
10. Higgins JPT, Altman DG, Gøtzsche PC, et al. The Cochrane Collaboration's tool for assessing risk of bias in randomised trials. 2011 doi: 10.1136/bmj.d5928
11. Higgins JPT, Thompson SG, Deeks JJ, et al. Measuring inconsistency in meta-analyses. 2003 doi: 10.1136/bmj.327.7414.557
12. Borenstein M, Hedges LV, Higgins JP, et al. A basic introduction to fixed-effect and random-effects models for meta-analysis. *Res Synth Methods* 2010;1(2):97-111. doi: 10.1002/jrsm.12 [published Online First: 2010/04/01]
13. McMurdo ME, Argo I, Phillips G, et al. Cranberry or trimethoprim for the prevention of recurrent urinary tract infections? A randomized controlled trial in older women. *J Antimicrob Chemother* 2009;63(2):389-95. doi: 10.1093/jac/dkn489 [published Online First: 2008/12/02]
14. Kranjcec B, Papes D, Altarac S. D-mannose powder for prophylaxis of recurrent urinary tract infections in women: a randomized clinical trial. *World J Urol* 2014;32(1):79-84. doi: 10.1007/s00345-013-1091-6 [published Online First: 2013/05/02]

15. Raz R, Colodner R, Rohana Y, et al. Effectiveness of estriol-containing vaginal pessaries and nitrofurantoin macrocrystal therapy in the prevention of recurrent urinary tract infection in postmenopausal women. *Clinical Infectious Diseases* 2003;36(11):1362-8.
16. Beerepoot MA, ter Riet G, Nys S, et al. Lactobacilli vs antibiotics to prevent urinary tract infections: a randomized, double-blind, noninferiority trial in postmenopausal women. *Arch Intern Med* 2012;172(9):704-12. doi: 10.1001/archinternmed.2012.777 [published Online First: 2012/07/12]
17. Beerepoot MA, Geerlings SE, van Haarst EP, et al. Nonantibiotic prophylaxis for recurrent urinary tract infections: a systematic review and meta-analysis of randomized controlled trials. *J Urol* 2013;190(6):1981-9. doi: 10.1016/j.juro.2013.04.142 [published Online First: 2013/07/23]
18. Perrotta C, Aznar M, Mejia R, et al. Oestrogens for preventing recurrent urinary tract infection in postmenopausal women. *Cochrane Database Syst Rev* 2008(2):Cd005131. doi: 10.1002/14651858.CD005131.pub2 [published Online First: 2008/04/22]
19. SIGN. Management of suspected bacterial urinary tract infection in adults: Scottish Intercollegiate Guidelines Network; 2015 [Available from: <http://www.sign.ac.uk/pdf/sign88.pdf>].
20. Gupta K, Hooton TM, Naber KG, et al. International clinical practice guidelines for the treatment of acute uncomplicated cystitis and pyelonephritis in women: A 2010 update by the Infectious Diseases Society of America and the European Society for Microbiology and Infectious Diseases. *Clin Infect Dis* 2011;52(5):e103-20. doi: 10.1093/cid/ciq257 [published Online First: 2011/02/05]
21. Dason S, Dason JT, Kapoor A. Guidelines for the diagnosis and management of recurrent urinary tract infection in women. *Can Urol Assoc J* 2011;5(5):316-22. doi: 10.5489/cuaj.11214
22. Hodkinson A, Kirkham JJ, Tudur-Smith C, et al. Reporting of harms data in RCTs: a systematic review of empirical assessments against the CONSORT harms extension. 2013 doi: 10.1136/bmjopen-2013-003436
23. Drekonja DM, Rector TS, Cutting A, et al. Urinary tract infection in male veterans: treatment patterns and outcomes. *JAMA Intern Med* 2013;173(1):62-8. doi: 10.1001/2013.jamainternmed.829 [published Online First: 2012/12/06]

1  
2  
3  
4  
5  
6  
7  
8  
9  
10  
11  
12  
13  
14  
15  
16  
17  
18  
19  
20  
21  
22  
23  
24  
25  
26  
27  
28  
29  
30  
31  
32  
33  
34  
35  
36  
37  
38  
39  
40  
41  
42  
43  
44  
45  
46  
47  
48  
49  
50  
51  
52  
53  
54  
55  
56  
57  
58  
59  
60

|                | Random sequence generation (selection bias) | Allocation concealment (selection bias) | Blinding of participants and personnel (performance bias) | Blinding of outcome assessment (detection bias) | Incomplete outcome data (attrition bias) | Selective reporting (reporting bias) | Other bias |
|----------------|---------------------------------------------|-----------------------------------------|-----------------------------------------------------------|-------------------------------------------------|------------------------------------------|--------------------------------------|------------|
| Beerepoot 2012 | +                                           | +                                       | +                                                         | +                                               | +                                        | ?                                    | ?          |
| Kranjcec 2014  | ?                                           | ?                                       | -                                                         | ?                                               | ?                                        | ?                                    | ?          |
| Raz 2003       | ?                                           | ?                                       | +                                                         | +                                               | ?                                        | ?                                    | ?          |

Figure 1. Summary of risk of bias assessment

231x309mm (300 x 300 DPI)

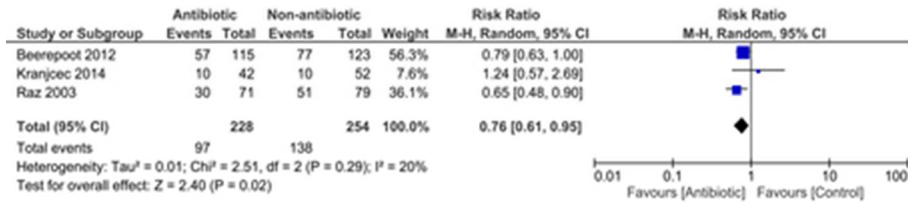

Figure 2. Forest plot showing results of meta-analysis for proportion of women experiencing a UTI during the prophylaxis period.

38x8mm (300 x 300 DPI)

For peer review only

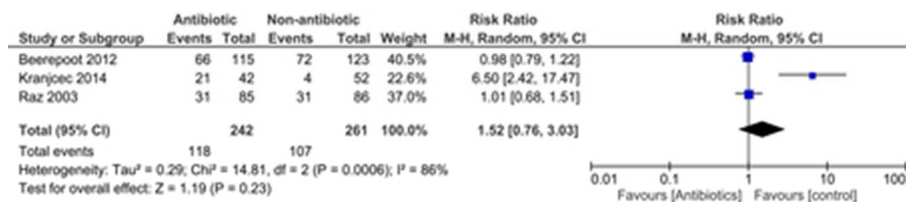

Figure 3. Forest plot showing results of meta-analysis for proportion of women experiencing mild side effect (treatment not withdrawn) during the prophylaxis period.

38x8mm (300 x 300 DPI)

For peer review only

1  
2  
3  
4  
5  
6  
7  
8  
9  
10  
11  
12  
13  
14  
15  
16  
17  
18  
19  
20  
21  
22  
23  
24  
25  
26  
27  
28  
29  
30  
31  
32  
33  
34  
35  
36  
37  
38  
39  
40  
41  
42  
43  
44  
45  
46  
47  
48  
49  
50  
51  
52  
53  
54  
55  
56  
57  
58  
59  
60

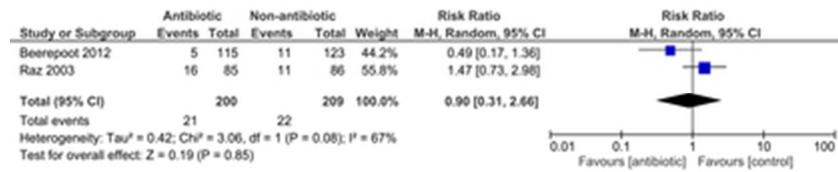

Figure 4. Forest plot showing results of meta-analysis for proportion of women experiencing a serious side effect (resulting in treatment withdrawal) during the prophylaxis period.

35x7mm (300 x 300 DPI)

Or peer review only



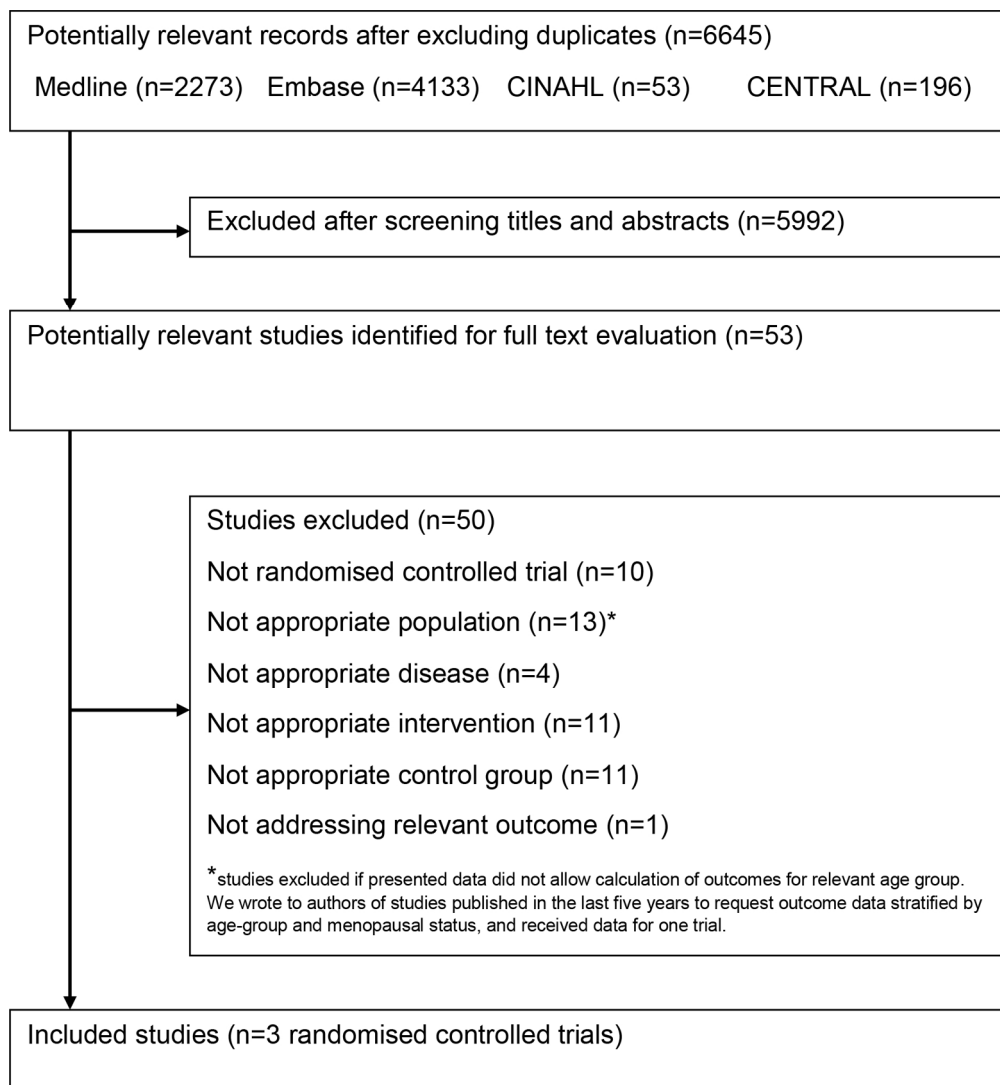

Appendix 1: PRISMA flowchart

159x171mm (300 x 300 DPI)

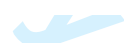

1  
2  
3  
4  
5  
6  
7  
8  
9  
10  
11  
12  
13  
14  
15  
16  
17  
18  
19  
20  
21  
22  
23  
24  
25  
26  
27  
28  
29  
30  
31  
32  
33  
34  
35  
36  
37  
38  
39  
40  
41  
42  
43  
44  
45  
46  
47  
48  
49  
50  
51  
52  
53  
54  
55  
56  
57  
58  
59  
60

## Appendix 1. PRISMA flowchart

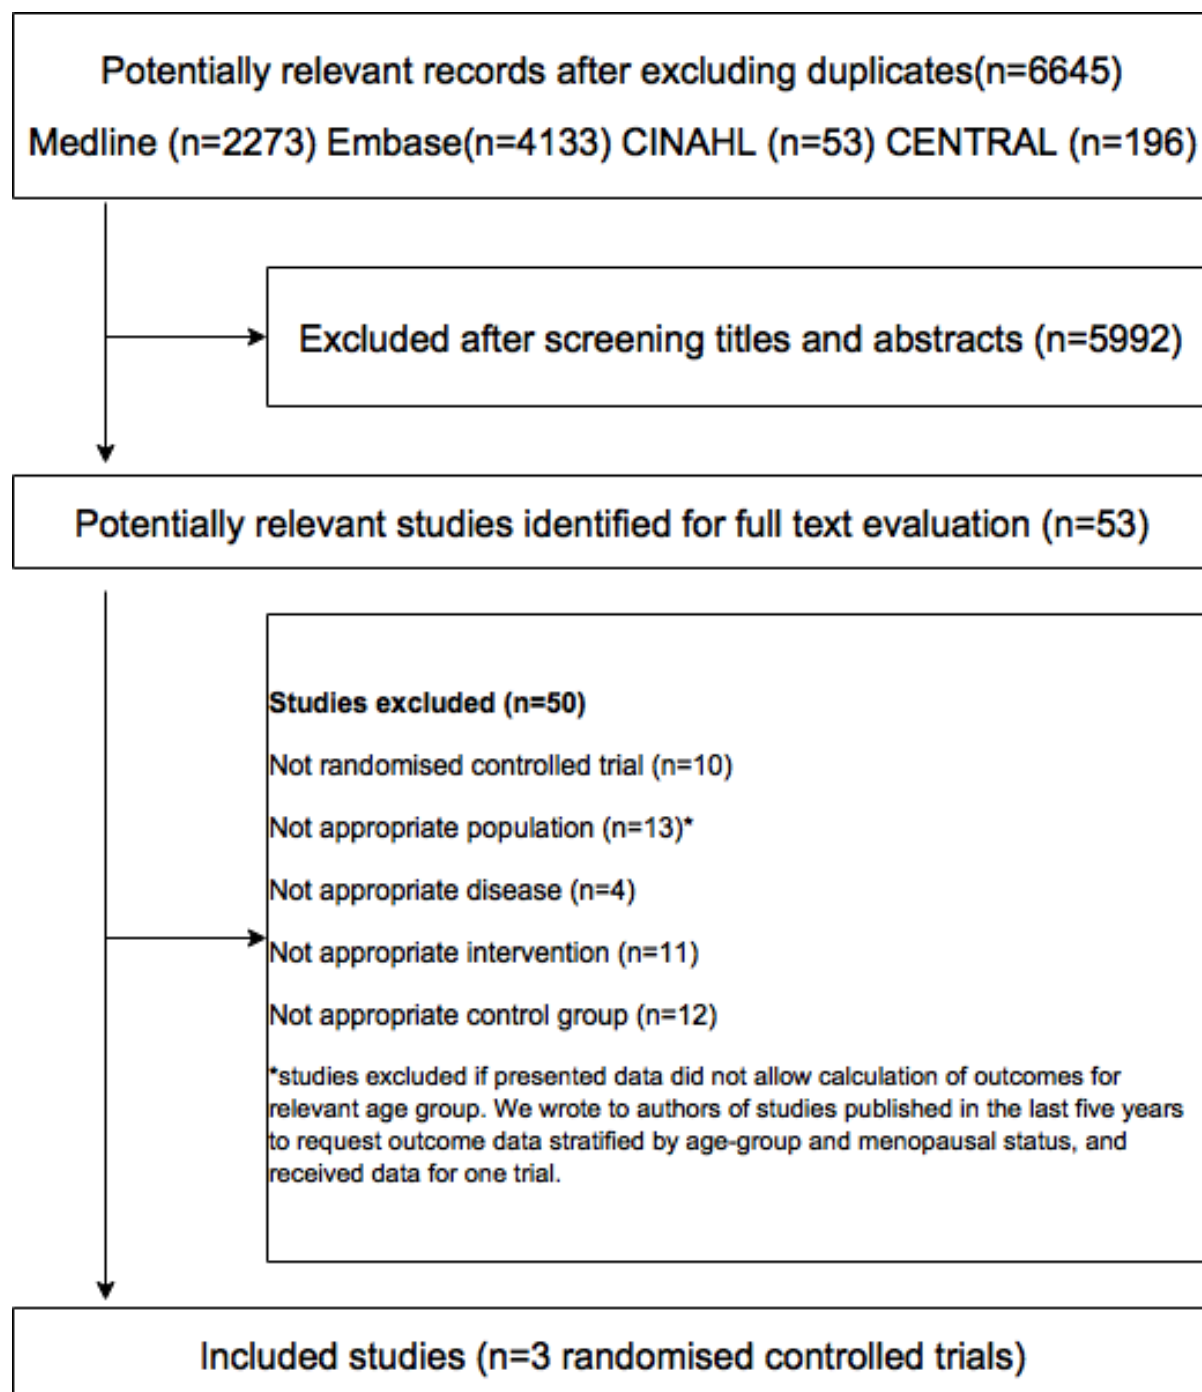

1  
2  
3 Appendix 2. Medline Search strategy  
4  
5

- 6 1. exp Urinary Tract Infections/  
7  
8 2. Urinary Tract Infection\*.mp.  
9  
10 3. exp Cystitis/  
11  
12 4. (bladder adj infection\*).mp. [mp=title, abstract, original title, name of substance word, subject  
13 heading word, keyword heading word, protocol supplementary concept word, rare disease  
14 supplementary concept word, unique identifier]  
15  
16 5. Bacteriuria.mp.  
17  
18 6. Pyuria.mp.  
19  
20 7. (recurrent adj urinary).mp. [mp=title, abstract, original title, name of substance word, subject  
21 heading word, keyword heading word, protocol supplementary concept word, rare disease  
22 supplementary concept word, unique identifier]  
23  
24 8. UTI.mp.  
25  
26 9. exp Anti-Bacterial Agents/ or exp Antibiotic Prophylaxis/  
27  
28 10. antimicrobial\*.mp.  
29  
30 11. randomized controlled trial.pt.  
31  
32 12. controlled clinical trial.pt.  
33  
34 13. randomized.ab.  
35  
36 14. placebo.ab.  
37  
38 15. clinical trials as topic.sh.  
39  
40 16. randomly.ab.  
41  
42 17. trial.ti.  
43  
44 18. 1 or 2 or 3 or 4 or 5 or 6 or 7 or 8  
45  
46 19. 9 or 10  
47  
48 20. 18 and 19  
49  
50 21. 11 or 12 or 13 or 14 or 15 or 16 or 17  
51  
52 22. exp animals/ not humans.sh.  
53  
54 23. 21 not 22  
55  
56 24. 20 and 23  
57  
58  
59  
60

1  
2  
3  
4  
5  
6  
7  
8  
9  
10  
11  
12  
13  
14  
15  
16  
17  
18  
19  
20  
21  
22  
23  
24  
25  
26  
27  
28  
29  
30  
31  
32  
33  
34  
35  
36  
37  
38  
39  
40  
41  
42  
43  
44  
45  
46  
47  
48  
49  
50  
51  
52  
53  
54  
55  
56  
57  
58  
59  
60

For peer review only

## Text S1 - Checklist of items to include when reporting a systematic review or meta-analysis

| Section/topic             | # | Checklist item                                                                                                                                                                                                                                                                                              | Reported on page # |
|---------------------------|---|-------------------------------------------------------------------------------------------------------------------------------------------------------------------------------------------------------------------------------------------------------------------------------------------------------------|--------------------|
| <b>TITLE</b>              |   |                                                                                                                                                                                                                                                                                                             |                    |
| Title                     | 1 | Identify the report as a systematic review, meta-analysis, or both.                                                                                                                                                                                                                                         | 1                  |
| <b>ABSTRACT</b>           |   |                                                                                                                                                                                                                                                                                                             |                    |
| Structured summary        | 2 | Provide a structured summary including, as applicable: background; objectives; data sources; study eligibility criteria, participants, and interventions; study appraisal and synthesis methods; results; limitations; conclusions and implications of key findings; systematic review registration number. | 3 and 4            |
| <b>INTRODUCTION</b>       |   |                                                                                                                                                                                                                                                                                                             |                    |
| Rationale                 | 3 | Describe the rationale for the review in the context of what is already known.                                                                                                                                                                                                                              | 5                  |
| Objectives                | 4 | Provide an explicit statement of questions being addressed with reference to participants, interventions, comparisons, outcomes, and study design (PICOS).                                                                                                                                                  | 6                  |
| <b>METHODS</b>            |   |                                                                                                                                                                                                                                                                                                             |                    |
| Protocol and registration | 5 | Indicate if a review protocol exists, if and where it can be accessed (e.g., Web address), and, if available, provide registration information including registration number.                                                                                                                               | 6                  |
| Eligibility criteria      | 6 | Specify study characteristics (e.g., PICOS, length of follow-up) and report characteristics (e.g., years considered, language, publication status) used as criteria for eligibility, giving rationale.                                                                                                      | 6                  |
| Information sources       | 7 | Describe all information sources (e.g., databases with dates of coverage, contact with study authors to identify additional studies) in the search and date last searched.                                                                                                                                  | 6                  |
| Search                    | 8 | Present full electronic search strategy for at least one database, including any limits used, such that it could be repeated.                                                                                                                                                                               | Appendix2          |

| Section/topic                      | #  | Checklist item                                                                                                                                                                                                         | Reported on page # |
|------------------------------------|----|------------------------------------------------------------------------------------------------------------------------------------------------------------------------------------------------------------------------|--------------------|
| Study selection                    | 9  | State the process for selecting studies (i.e., screening, eligibility, included in systematic review, and, if applicable, included in the meta-analysis).                                                              | 6-7                |
| Data collection process            | 10 | Describe method of data extraction from reports (e.g., piloted forms, independently, in duplicate) and any processes for obtaining and confirming data from investigators.                                             | 8                  |
| Data items                         | 11 | List and define all variables for which data were sought (e.g., PICOS, funding sources) and any assumptions and simplifications made.                                                                                  | 8                  |
| Risk of bias in individual studies | 12 | Describe methods used for assessing risk of bias of individual studies (including specification of whether this was done at the study or outcome level), and how this information is to be used in any data synthesis. | 8                  |
| Summary measures                   | 13 | State the principal summary measures (e.g., risk ratio, difference in means).                                                                                                                                          | 8                  |
| Synthesis of results               | 14 | Describe the methods of handling data and combining results of studies, if done, including measures of consistency (e.g., $I^2$ ) for each meta-analysis.                                                              | 8                  |
| Risk of bias across studies        | 15 | Specify any assessment of risk of bias that may affect the cumulative evidence (e.g., publication bias, selective reporting within studies).                                                                           | -                  |
| Additional analyses                | 16 | Describe methods of additional analyses (e.g., sensitivity or subgroup analyses, meta-regression), if done, indicating which were pre-specified.                                                                       | 8                  |
| <b>RESULTS</b>                     |    |                                                                                                                                                                                                                        |                    |
| Study selection                    | 17 | Give numbers of studies screened, assessed for eligibility, and included in the review, with reasons for exclusions at each stage, ideally with a flow diagram.                                                        | Appendix1          |
| Study characteristics              | 18 | For each study, present characteristics for which data were extracted (e.g., study size, PICOS, follow-up period) and provide the citations.                                                                           | Table1             |
| Risk of bias within studies        | 19 | Present data on risk of bias of each study and, if available, any outcome-level assessment (see Item 12).                                                                                                              | Figure1 page 11    |
| Results of individual studies      | 20 | For all outcomes considered (benefits or harms), present, for each study: (a) simple summary data for each intervention group and (b) effect estimates and                                                             | 12-14              |

| Section/topic               | #  | Checklist item                                                                                                                                                                        | Reported on page # |
|-----------------------------|----|---------------------------------------------------------------------------------------------------------------------------------------------------------------------------------------|--------------------|
|                             |    | confidence intervals, ideally with a forest plot.                                                                                                                                     |                    |
| Synthesis of results        | 21 | Present results of each meta-analysis done, including confidence intervals and measures of consistency.                                                                               | 12-14              |
| Risk of bias across studies | 22 | Present results of any assessment of risk of bias across studies (see Item 15).                                                                                                       | Figure1 page 11    |
| Additional analysis         | 23 | Give results of additional analyses, if done (e.g., sensitivity or subgroup analyses, meta-regression) (see Item 16).                                                                 | 14                 |
| <b>DISCUSSION</b>           |    |                                                                                                                                                                                       |                    |
| Summary of evidence         | 24 | Summarize the main findings including the strength of evidence for each main outcome; consider their relevance to key groups (e.g., health care providers, users, and policy makers). | 15                 |
| Limitations                 | 25 | Discuss limitations at study and outcome level (e.g., risk of bias), and at review level (e.g., incomplete retrieval of identified research, reporting bias).                         | 15                 |
| Conclusions                 | 26 | Provide a general interpretation of the results in the context of other evidence, and implications for future research.                                                               | 16                 |
| <b>FUNDING1</b>             |    |                                                                                                                                                                                       |                    |
| Funding                     | 27 | Describe sources of funding for the systematic review and other support (e.g., supply of data); role of funders for the systematic review.                                            | 19                 |
