# Supplementary material for: Long-term antibiotics for prevention of recurrent urinary tract infection in older adults: systematic review and meta-analysis of randomised trials
Source: PubMed Central journal article supplement — BMJ Open. 2017 May 29;7(5):e015233. doi: 10.1136/bmjopen-2016-015233 (PMC5729980; doi:10.1136/bmjopen-2016-015233), 2017-05-29

## Appendix 1. Medline Search strategy

1. exp Urinary Tract Infections/
2. Urinary Tract Infection\*.mp.
3. exp Cystitis/
4. (bladder adj infection\*).mp. [mp=title, abstract, original title, name of substance word, subject heading word, keyword heading word, protocol supplementary concept word, rare disease supplementary concept word, unique identifier]
5. Bacteriuria.mp.
6. Pyuria.mp.
7. (recurrent adj urinary).mp. [mp=title, abstract, original title, name of substance word, subject heading word, keyword heading word, protocol supplementary concept word, rare disease supplementary concept word, unique identifier]
8. UTI.mp.
9. exp Anti-Bacterial Agents/ or exp Antibiotic Prophylaxis/
10. antimicrobial\*.mp.
11. randomized controlled trial.pt.
12. controlled clinical trial.pt.
13. randomized.ab.
14. placebo.ab.
15. clinical trials as topic.sh.
16. randomly.ab.
17. trial.ti.
18. 1 or 2 or 3 or 4 or 5 or 6 or 7 or 8
19. 9 or 10
20. 18 and 19
21. 11 or 12 or 13 or 14 or 15 or 16 or 17
22. exp animals/ not humans.sh.
23. 21 not 22
24. 20 and 23

Appendix 2. PRISMA flowchart

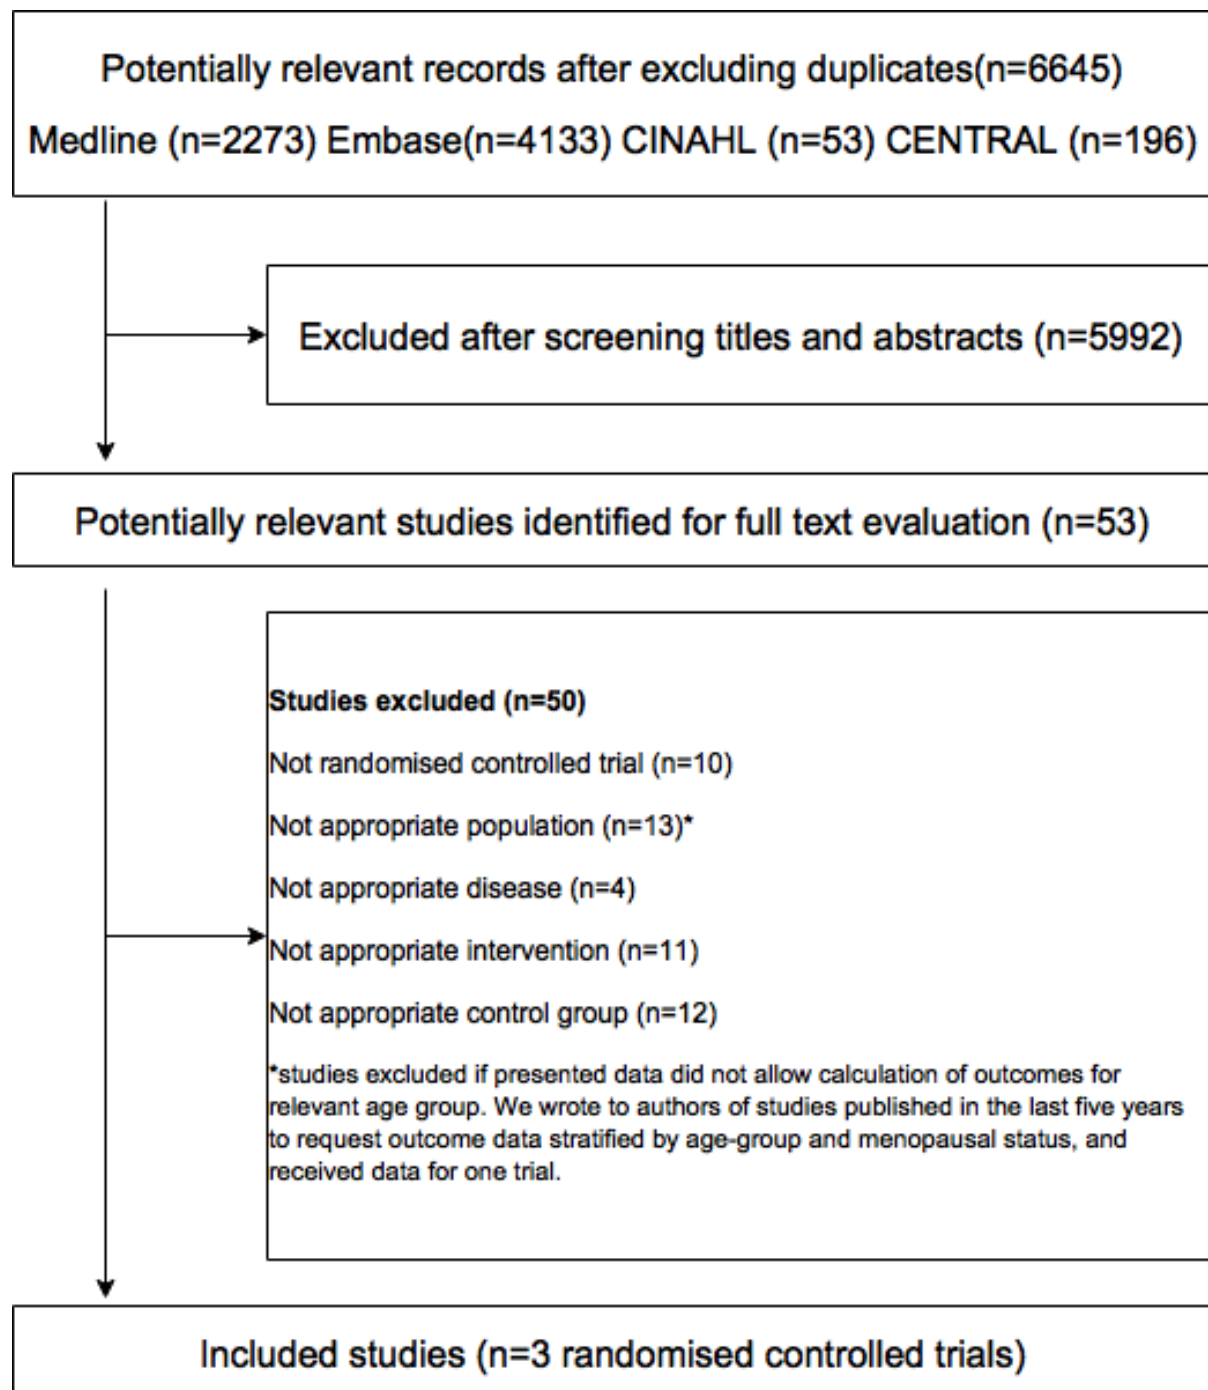

Supplement: bmjopen-2016-015233supp001.pdf [file bmjopen-2016-015233supp001.pdf]
